# Supplementary material
Source: publisher figshare collection journal article supplement (https://karger.figshare.com/ndownloader/files/26618075)
Supplement: Supplementary file 1 [file 26618075]

**PUBMED Search Queries**

| **ALS** |
| --- |
| ("Amyotrophic Lateral Sclerosis"[Mesh] OR "Amyotrophic Lateral Sclerosis"[tiab] OR "Lou Gehrig Disease"[tiab] OR "Gehrig Disease"[tiab] OR "Guam Disease"[tiab] OR "Charcot Disease"[tiab] OR ALS[tiab]) AND ("Cannabinoids"[Mesh] OR Cannabinoids[tiab] OR Cannabinoid[tiab] OR "Cannabis"[Mesh] OR "Cannabis"[tiab] OR Marijuana[tiab] OR Marihuana[tiab] OR "Dronabinol"[Mesh] OR "Dronabinol"[tiab] OR Tetrahydrocannabinol[tiab] OR THC[tiab] OR "Cannabidiol"[Mesh] OR "Cannabidiol"[tiab] OR Marinol[tiab] OR "synthetic cannabinoids"[tiab] OR "synthetic cannabinoid"[tiab] OR SCB[tiab] OR "Medical Marijuana"[Mesh] OR "Medical Marijuana"[tiab] OR "Medicinal Cannabis"[tiab] OR "Marijuana Treatment"[tiab] OR "Medical Cannabis"[tiab] OR "Cannabinol"[Mesh] OR "Cannabinol"[tiab]) OR ((spice[tiab] OR spices[tiab] OR K2[tiab]) AND ("Cannabinoids"[Mesh] OR Cannabinoids[tiab] OR Cannabinoid[tiab] OR "Cannabis"[Mesh] OR "Cannabis"[tiab] OR Marijuana[tiab] OR Marihuana[tiab] OR "Dronabinol"[Mesh] OR "Dronabinol"[tiab] OR Tetrahydrocannabinol[tiab] OR THC[tiab] OR "Cannabidiol"[Mesh] OR "Cannabidiol"[tiab] OR Marinol[tiab] OR "synthetic cannabinoids"[tiab] OR "synthetic cannabinoid"[tiab] OR SCB[tiab] OR "Medical Marijuana"[Mesh] OR "Medical Marijuana"[tiab] OR "Medicinal Cannabis"[tiab] OR "Marijuana Treatment"[tiab] OR "Medical Cannabis"[tiab] OR "Cannabinol"[Mesh] OR "Cannabinol"[tiab])) |
|  |
| **Autism** |
| ("Autistic Disorder"[Mesh] OR "Autistic Disorder"[tiab] OR "Kanner Syndrome"[tiab] OR "Infantile Autism"[tiab] OR autism[tiab] OR "Autism Spectrum Disorder"[Mesh] OR "Autism Spectrum Disorder"[tiab] OR autistic[tiab]) AND ("Cannabinoids"[Mesh] OR Cannabinoids[tiab] OR Cannabinoid[tiab] OR "Cannabis"[Mesh] OR "Cannabis"[tiab] OR Marijuana[tiab] OR Marihuana[tiab] OR "Dronabinol"[Mesh] OR "Dronabinol"[tiab] OR Tetrahydrocannabinol[tiab] OR THC[tiab] OR "Cannabidiol"[Mesh] OR "Cannabidiol"[tiab] OR Marinol[tiab] OR "synthetic cannabinoids"[tiab] OR "synthetic cannabinoid"[tiab] OR SCB[tiab] OR "Medical Marijuana"[Mesh] OR "Medical Marijuana"[tiab] OR "Medicinal Cannabis"[tiab] OR "Marijuana Treatment"[tiab] OR "Medical Cannabis"[tiab] OR "Cannabinol"[Mesh] OR "Cannabinol"[tiab]) OR ((spice[tiab] OR spices[tiab] OR K2[tiab]) AND ("Cannabinoids"[Mesh] OR Cannabinoids[tiab] OR Cannabinoid[tiab] OR "Cannabis"[Mesh] OR "Cannabis"[tiab] OR Marijuana[tiab] OR Marihuana[tiab] OR "Dronabinol"[Mesh] OR "Dronabinol"[tiab] OR Tetrahydrocannabinol[tiab] OR THC[tiab] OR "Cannabidiol"[Mesh] OR "Cannabidiol"[tiab] OR Marinol[tiab] OR "synthetic cannabinoids"[tiab] OR "synthetic cannabinoid"[tiab] OR SCB[tiab] OR "Medical Marijuana"[Mesh] OR "Medical Marijuana"[tiab] OR "Medicinal Cannabis"[tiab] OR "Marijuana Treatment"[tiab] OR "Medical Cannabis"[tiab] OR "Cannabinol"[Mesh] OR "Cannabinol"[tiab])) |
|  |
| **Cancer** |
| ("Cannabinoids"[Mesh] OR Cannabinoids[tiab] OR Cannabinoid[tiab] OR "Cannabis"[Mesh] OR "Cannabis"[tiab] OR Marijuana[tiab] OR Marihuana[tiab] OR "Dronabinol"[Mesh] OR "Dronabinol"[tiab] OR Tetrahydrocannabinol[tiab] OR THC[tiab] OR "Cannabidiol"[Mesh] OR "Cannabidiol"[tiab] OR Marinol[tiab] OR "synthetic cannabinoids"[tiab] OR "synthetic cannabinoid"[tiab] OR SCB[tiab] OR "Medical Marijuana"[Mesh] OR "Medical Marijuana"[tiab] OR "Medicinal Cannabis"[tiab] OR "Marijuana Treatment"[tiab] OR "Medical Cannabis"[tiab] OR "Cannabinol"[Mesh] OR "Cannabinol"[tiab]) OR ((spice[tiab] OR spices[tiab] OR K2[tiab]) AND ("Cannabinoids"[Mesh] OR Cannabinoids[tiab] OR Cannabinoid[tiab] OR "Cannabis"[Mesh] OR "Cannabis"[tiab] OR Marijuana[tiab] OR Marihuana[tiab] OR "Dronabinol"[Mesh] OR "Dronabinol"[tiab] OR Tetrahydrocannabinol[tiab] OR THC[tiab] OR "Cannabidiol"[Mesh] OR "Cannabidiol"[tiab] OR Marinol[tiab] OR "synthetic cannabinoids"[tiab] OR "synthetic cannabinoid"[tiab] OR SCB[tiab] OR "Medical Marijuana"[Mesh] OR "Medical Marijuana"[tiab] OR "Medicinal Cannabis"[tiab] OR "Marijuana Treatment"[tiab] OR "Medical Cannabis"[tiab] OR "Cannabinol"[Mesh] OR "Cannabinol"[tiab])) AND ("Neoplasms"[Mesh] OR cancer[tiab] OR neoplasms[tiab] OR neoplasm[tiab] OR Cancer*[tiab] OR Malignan*[tiab] OR tumor[tiab] OR tumors[tiab] OR tumour[tiab]) |
|  |
| **Chronic Non-Malignant Pain** |
| ("chronic nonmalignant pain"[tiab] OR "chronic pain"[tiab] OR "Chronic Pain"[Mesh] OR "Chronic Pains"[tiab]) AND ("Cannabinoids"[Mesh] OR Cannabinoids[tiab] OR Cannabinoid[tiab] OR "Cannabis"[Mesh] OR "Cannabis"[tiab] OR Marijuana[tiab] OR Marihuana[tiab] OR "Dronabinol"[Mesh] OR "Dronabinol"[tiab] OR Tetrahydrocannabinol[tiab] OR THC[tiab] OR "Cannabidiol"[Mesh] OR "Cannabidiol"[tiab] OR Marinol[tiab] OR "synthetic cannabinoids"[tiab] OR "synthetic cannabinoid"[tiab] OR SCB[tiab] OR "Medical Marijuana"[Mesh] OR "Medical Marijuana"[tiab] OR "Medicinal Cannabis"[tiab] OR "Marijuana Treatment"[tiab] OR "Medical Cannabis"[tiab] OR "Cannabinol"[Mesh] OR "Cannabinol"[tiab]) OR ((spice[tiab] OR spices[tiab] OR K2[tiab]) AND ("Cannabinoids"[Mesh] OR Cannabinoids[tiab] OR Cannabinoid[tiab] OR "Cannabis"[Mesh] OR "Cannabis"[tiab] OR Marijuana[tiab] OR Marihuana[tiab] OR "Dronabinol"[Mesh] OR "Dronabinol"[tiab] OR Tetrahydrocannabinol[tiab] OR THC[tiab] OR "Cannabidiol"[Mesh] OR "Cannabidiol"[tiab] OR Marinol[tiab] OR "synthetic cannabinoids"[tiab] OR "synthetic cannabinoid"[tiab] OR SCB[tiab] OR "Medical Marijuana"[Mesh] OR "Medical Marijuana"[tiab] OR "Medicinal Cannabis"[tiab] OR "Marijuana Treatment"[tiab] OR "Medical Cannabis"[tiab] OR "Cannabinol"[Mesh] OR "Cannabinol"[tiab])) |
|  |
| **Crohns Disease** |
| ("Crohn Disease"[Mesh] OR "Crohn Disease"[tiab] OR crohn[tiab] OR crohns[tiab] OR "Crohn's Enteritis"[tiab] OR "Regional Enteritis"[tiab] OR "Granulomatous Enteritis"[tiab] OR Ileocolitis[tiab] OR "Granulomatous Colitis"[tiab] OR "Terminal Ileitis"[tiab] OR "Regional Ileitis"[tiab]) AND ("Cannabinoids"[Mesh] OR Cannabinoids[tiab] OR Cannabinoid[tiab] OR "Cannabis"[Mesh] OR "Cannabis"[tiab] OR Marijuana[tiab] OR Marihuana[tiab] OR "Dronabinol"[Mesh] OR "Dronabinol"[tiab] OR Tetrahydrocannabinol[tiab] OR THC[tiab] OR "Cannabidiol"[Mesh] OR "Cannabidiol"[tiab] OR Marinol[tiab] OR "synthetic cannabinoids"[tiab] OR "synthetic cannabinoid"[tiab] OR SCB[tiab] OR "Medical Marijuana"[Mesh] OR "Medical Marijuana"[tiab] OR "Medicinal Cannabis"[tiab] OR "Marijuana Treatment"[tiab] OR "Medical Cannabis"[tiab] OR "Cannabinol"[Mesh] OR "Cannabinol"[tiab]) OR ((spice[tiab] OR spices[tiab] OR K2[tiab]) AND ("Cannabinoids"[Mesh] OR Cannabinoids[tiab] OR Cannabinoid[tiab] OR "Cannabis"[Mesh] OR "Cannabis"[tiab] OR Marijuana[tiab] OR Marihuana[tiab] OR "Dronabinol"[Mesh] OR "Dronabinol"[tiab] OR Tetrahydrocannabinol[tiab] OR THC[tiab] OR "Cannabidiol"[Mesh] OR "Cannabidiol"[tiab] OR Marinol[tiab] OR "synthetic cannabinoids"[tiab] OR "synthetic cannabinoid"[tiab] OR SCB[tiab] OR "Medical Marijuana"[Mesh] OR "Medical Marijuana"[tiab] OR "Medicinal Cannabis"[tiab] OR "Marijuana Treatment"[tiab] OR "Medical Cannabis"[tiab] OR "Cannabinol"[Mesh] OR "Cannabinol"[tiab])) |
|  |
| **Epilepsy** |
| ("Cannabinoids"[Mesh] OR Cannabinoids[tiab] OR Cannabinoid[tiab] OR "Cannabis"[Mesh] OR "Cannabis"[tiab] OR Marijuana[tiab] OR Marihuana[tiab] OR "Dronabinol"[Mesh] OR "Dronabinol"[tiab] OR Tetrahydrocannabinol[tiab] OR THC[tiab] OR "Cannabidiol"[Mesh] OR "Cannabidiol"[tiab] OR Marinol[tiab] OR "synthetic cannabinoids"[tiab] OR "synthetic cannabinoid"[tiab] OR SCB[tiab] OR "Medical Marijuana"[Mesh] OR "Medical Marijuana"[tiab] OR "Medicinal Cannabis"[tiab] OR "Marijuana Treatment"[tiab] OR "Medical Cannabis"[tiab] OR "Cannabinol"[Mesh] OR "Cannabinol"[tiab]) OR ((spice[tiab] OR spices[tiab] OR K2[tiab]) AND ("Cannabinoids"[Mesh] OR Cannabinoids[tiab] OR Cannabinoid[tiab] OR "Cannabis"[Mesh] OR "Cannabis"[tiab] OR Marijuana[tiab] OR Marihuana[tiab] OR "Dronabinol"[Mesh] OR "Dronabinol"[tiab] OR Tetrahydrocannabinol[tiab] OR THC[tiab] OR "Cannabidiol"[Mesh] OR "Cannabidiol"[tiab] OR Marinol[tiab] OR "synthetic cannabinoids"[tiab] OR "synthetic cannabinoid"[tiab] OR SCB[tiab] OR "Medical Marijuana"[Mesh] OR "Medical Marijuana"[tiab] OR "Medicinal Cannabis"[tiab] OR "Marijuana Treatment"[tiab] OR "Medical Cannabis"[tiab] OR "Cannabinol"[Mesh] OR "Cannabinol"[tiab])) AND ("Epilepsy"[Mesh] OR Epilep*[tiab] OR "Seizure Disorder"[tiab] OR "Seizure Disorders"[tiab] OR Aura*[tiab]) |
|  |
| **Glaucoma** |
| ("Cannabinoids"[Mesh] OR Cannabinoids[tiab] OR Cannabinoid[tiab] OR "Cannabis"[Mesh] OR "Cannabis"[tiab] OR Marijuana[tiab] OR Marihuana[tiab] OR "Dronabinol"[Mesh] OR "Dronabinol"[tiab] OR Tetrahydrocannabinol[tiab] OR THC[tiab] OR "Cannabidiol"[Mesh] OR "Cannabidiol"[tiab] OR Marinol[tiab] OR "synthetic cannabinoids"[tiab] OR "synthetic cannabinoid"[tiab] OR SCB[tiab] OR "Medical Marijuana"[Mesh] OR "Medical Marijuana"[tiab] OR "Medicinal Cannabis"[tiab] OR "Marijuana Treatment"[tiab] OR "Medical Cannabis"[tiab] OR "Cannabinol"[Mesh] OR "Cannabinol"[tiab]) OR ((spice[tiab] OR spices[tiab] OR K2[tiab]) AND ("Cannabinoids"[Mesh] OR Cannabinoids[tiab] OR Cannabinoid[tiab] OR "Cannabis"[Mesh] OR "Cannabis"[tiab] OR Marijuana[tiab] OR Marihuana[tiab] OR "Dronabinol"[Mesh] OR "Dronabinol"[tiab] OR Tetrahydrocannabinol[tiab] OR THC[tiab] OR "Cannabidiol"[Mesh] OR "Cannabidiol"[tiab] OR Marinol[tiab] OR "synthetic cannabinoids"[tiab] OR "synthetic cannabinoid"[tiab] OR SCB[tiab] OR "Medical Marijuana"[Mesh] OR "Medical Marijuana"[tiab] OR "Medicinal Cannabis"[tiab] OR "Marijuana Treatment"[tiab] OR "Medical Cannabis"[tiab] OR "Cannabinol"[Mesh] OR "Cannabinol"[tiab])) AND ("Glaucoma"[Mesh] OR Glaucoma*[tiab] OR "Ocular Hypertension"[Mesh] OR "Ocular Hypertension"[tiab] OR "Ocular Hypertensions"[tiab] OR "Suspect Glaucoma"[tiab] OR "Suspect Glaucomas"[tiab]) |
|  |
| **HIV/AIDS** |
| ("Cannabinoids"[Mesh] OR Cannabinoids[tiab] OR Cannabinoid[tiab] OR "Cannabis"[Mesh] OR "Cannabis"[tiab] OR Marijuana[tiab] OR Marihuana[tiab] OR "Dronabinol"[Mesh] OR "Dronabinol"[tiab] OR Tetrahydrocannabinol[tiab] OR THC[tiab] OR "Cannabidiol"[Mesh] OR "Cannabidiol"[tiab] OR Marinol[tiab] OR "synthetic cannabinoids"[tiab] OR "synthetic cannabinoid"[tiab] OR SCB[tiab] OR "Medical Marijuana"[Mesh] OR "Medical Marijuana"[tiab] OR "Medicinal Cannabis"[tiab] OR "Marijuana Treatment"[tiab] OR "Medical Cannabis"[tiab] OR "Cannabinol"[Mesh] OR "Cannabinol"[tiab]) OR ((spice[tiab] OR spices[tiab] OR K2[tiab]) AND ("Cannabinoids"[Mesh] OR Cannabinoids[tiab] OR Cannabinoid[tiab] OR "Cannabis"[Mesh] OR "Cannabis"[tiab] OR Marijuana[tiab] OR Marihuana[tiab] OR "Dronabinol"[Mesh] OR "Dronabinol"[tiab] OR Tetrahydrocannabinol[tiab] OR THC[tiab] OR "Cannabidiol"[Mesh] OR "Cannabidiol"[tiab] OR Marinol[tiab] OR "synthetic cannabinoids"[tiab] OR "synthetic cannabinoid"[tiab] OR SCB[tiab] OR "Medical Marijuana"[Mesh] OR "Medical Marijuana"[tiab] OR "Medicinal Cannabis"[tiab] OR "Marijuana Treatment"[tiab] OR "Medical Cannabis"[tiab] OR "Cannabinol"[Mesh] OR "Cannabinol"[tiab])) AND ("HIV"[Mesh] OR HIV[tiab] OR "Human Immunodeficiency Virus"[tiab] OR "Human Immunodeficiency Viruses"[tiab] OR "Human T Cell Lymphotropic Virus Type III"[tiab] OR "Human T Cell Leukemia Virus Type III"[tiab] OR LAV-HTLV-III[tiab] OR "Lymphadenopathy Associated Virus"[tiab] OR "Human T Lymphotropic Virus Type III"[tiab] OR "AIDS Virus"[tiab] OR AIDS[tiab] OR "AIDS Viruses"[tiab] OR "Acquired Immune Deficiency Syndrome Virus"[tiab] OR "Acquired Immunodeficiency Syndrome Virus"[tiab] OR HTLV-III[tiab] OR "Acquired Immunodeficiency Syndrome"[Mesh] OR “Acquired Immune Deficiency Syndrome”[tiab] OR “Acquired Immune Deficiency Syndromes”[tiab] OR “Acquired Immunodeficiency Syndromes”[tiab]) |
|  |
| **Multiple Sclerosis** |
| ("Multiple Sclerosis"[Mesh] OR "Multiple Sclerosis"[tiab] OR "Disseminated Sclerosis"[tiab]) AND ("Cannabinoids"[Mesh] OR Cannabinoids[tiab] OR Cannabinoid[tiab] OR "Cannabis"[Mesh] OR "Cannabis"[tiab] OR Marijuana[tiab] OR Marihuana[tiab] OR "Dronabinol"[Mesh] OR "Dronabinol"[tiab] OR Tetrahydrocannabinol[tiab] OR THC[tiab] OR "Cannabidiol"[Mesh] OR "Cannabidiol"[tiab] OR Marinol[tiab] OR "synthetic cannabinoids"[tiab] OR "synthetic cannabinoid"[tiab] OR SCB[tiab] OR "Medical Marijuana"[Mesh] OR "Medical Marijuana"[tiab] OR "Medicinal Cannabis"[tiab] OR "Marijuana Treatment"[tiab] OR "Medical Cannabis"[tiab] OR "Cannabinol"[Mesh] OR "Cannabinol"[tiab]) OR ((spice[tiab] OR spices[tiab] OR K2[tiab]) AND ("Cannabinoids"[Mesh] OR Cannabinoids[tiab] OR Cannabinoid[tiab] OR "Cannabis"[Mesh] OR "Cannabis"[tiab] OR Marijuana[tiab] OR Marihuana[tiab] OR "Dronabinol"[Mesh] OR "Dronabinol"[tiab] OR Tetrahydrocannabinol[tiab] OR THC[tiab] OR "Cannabidiol"[Mesh] OR "Cannabidiol"[tiab] OR Marinol[tiab] OR "synthetic cannabinoids"[tiab] OR "synthetic cannabinoid"[tiab] OR SCB[tiab] OR "Medical Marijuana"[Mesh] OR "Medical Marijuana"[tiab] OR "Medicinal Cannabis"[tiab] OR "Marijuana Treatment"[tiab] OR "Medical Cannabis"[tiab] OR "Cannabinol"[Mesh] OR "Cannabinol"[tiab])) |
|  |
| **Parkinsons Disease** |
| ("Parkinson Disease"[Mesh] OR "Parkinson Disease"[tiab] OR "Lewy Body Parkinson Disease"[tiab] OR "Primary Parkinsonism"[tiab] OR "Idiopathic Parkinson Disease"[tiab]) AND ("Cannabinoids"[Mesh] OR Cannabinoids[tiab] OR Cannabinoid[tiab] OR "Cannabis"[Mesh] OR "Cannabis"[tiab] OR Marijuana[tiab] OR Marihuana[tiab] OR "Dronabinol"[Mesh] OR "Dronabinol"[tiab] OR Tetrahydrocannabinol[tiab] OR THC[tiab] OR "Cannabidiol"[Mesh] OR "Cannabidiol"[tiab] OR Marinol[tiab] OR "synthetic cannabinoids"[tiab] OR "synthetic cannabinoid"[tiab] OR SCB[tiab] OR "Medical Marijuana"[Mesh] OR "Medical Marijuana"[tiab] OR "Medicinal Cannabis"[tiab] OR "Marijuana Treatment"[tiab] OR "Medical Cannabis"[tiab] OR "Cannabinol"[Mesh] OR "Cannabinol"[tiab]) OR ((spice[tiab] OR spices[tiab] OR K2[tiab]) AND ("Cannabinoids"[Mesh] OR Cannabinoids[tiab] OR Cannabinoid[tiab] OR "Cannabis"[Mesh] OR "Cannabis"[tiab] OR Marijuana[tiab] OR Marihuana[tiab] OR "Dronabinol"[Mesh] OR "Dronabinol"[tiab] OR Tetrahydrocannabinol[tiab] OR THC[tiab] OR "Cannabidiol"[Mesh] OR "Cannabidiol"[tiab] OR Marinol[tiab] OR "synthetic cannabinoids"[tiab] OR "synthetic cannabinoid"[tiab] OR SCB[tiab] OR "Medical Marijuana"[Mesh] OR "Medical Marijuana"[tiab] OR "Medicinal Cannabis"[tiab] OR "Marijuana Treatment"[tiab] OR "Medical Cannabis"[tiab] OR "Cannabinol"[Mesh] OR "Cannabinol"[tiab])) |
|  |
| **PTSD** |
| ("Stress Disorders, Post-Traumatic"[Mesh] OR PTSD[tiab] OR "Posttraumatic Neuroses"[tiab] OR "Posttraumatic Stress Disorders"[tiab] OR "Posttraumatic Stress Disorder"[tiab] OR "Post-Traumatic Neuroses"[tiab] OR "Post Traumatic Stress Disorders"[tiab] OR "Post Traumatic Stress Disorder"[tiab] OR "Acute Post Traumatic Stress Disorder"[tiab] OR "Chronic Post-Traumatic Stress Disorder"[tiab]) AND ("Cannabinoids"[Mesh] OR Cannabinoids[tiab] OR Cannabinoid[tiab] OR "Cannabis"[Mesh] OR "Cannabis"[tiab] OR Marijuana[tiab] OR Marihuana[tiab] OR "Dronabinol"[Mesh] OR "Dronabinol"[tiab] OR Tetrahydrocannabinol[tiab] OR THC[tiab] OR "Cannabidiol"[Mesh] OR "Cannabidiol"[tiab] OR Marinol[tiab] OR "synthetic cannabinoids"[tiab] OR "synthetic cannabinoid"[tiab] OR SCB[tiab] OR "Medical Marijuana"[Mesh] OR "Medical Marijuana"[tiab] OR "Medicinal Cannabis"[tiab] OR "Marijuana Treatment"[tiab] OR "Medical Cannabis"[tiab] OR "Cannabinol"[Mesh] OR "Cannabinol"[tiab]) OR ((spice[tiab] OR spices[tiab] OR K2[tiab]) AND ("Cannabinoids"[Mesh] OR Cannabinoids[tiab] OR Cannabinoid[tiab] OR "Cannabis"[Mesh] OR "Cannabis"[tiab] OR Marijuana[tiab] OR Marihuana[tiab] OR "Dronabinol"[Mesh] OR "Dronabinol"[tiab] OR Tetrahydrocannabinol[tiab] OR THC[tiab] OR "Cannabidiol"[Mesh] OR "Cannabidiol"[tiab] OR Marinol[tiab] OR "synthetic cannabinoids"[tiab] OR "synthetic cannabinoid"[tiab] OR SCB[tiab] OR "Medical Marijuana"[Mesh] OR "Medical Marijuana"[tiab] OR "Medicinal Cannabis"[tiab] OR "Marijuana Treatment"[tiab] OR "Medical Cannabis"[tiab] OR "Cannabinol"[Mesh] OR "Cannabinol"[tiab])) |

**EMBASE Search Queries**

| **CONDITION** |  | **Results** |  |
| --- | --- | --- | --- |
|  |  |  |  |
| **ALS** |  |  |  |
| ('amyotrophic lateral sclerosis'/exp OR 'als (amyotrophic lateral sclerosis)':ti,ab OR 'lou gehrig disease':ti,ab OR 'lou gehrig`s disease':ti,ab OR 'als dementia':ti,ab OR 'amyotrophic lateral sclerosis':ti,ab OR 'lateral sclerosis, amyotrophic':ti,ab OR 'sclerosis, amyotrophic lateral':ti,ab OR 'guam disease':ti,ab OR 'neuropathic joint disease'/exp OR 'charcot joint':ti,ab OR 'arthropathy, neurogenic':ti,ab OR 'backbone, charcot':ti,ab OR 'charcot arthropathy':ti,ab OR 'charcot backbone':ti,ab OR 'charcot disease':ti,ab OR 'charcot spine':ti,ab OR 'neurogenic arthropathy':ti,ab OR 'neuropathic joint':ti,ab OR 'neuropathic joint disease':ti,ab OR 'spine, charcot':ti,ab OR als:ti,ab) AND ('cannabinoid'/exp OR 'cannabinoid':ti,ab OR 'cannabinoids':ti,ab OR 'cannabis'/exp OR 'cannabis sativa extract':ti,ab OR 'cannabis sativa leaf':ti,ab OR 'cannabis sativa resin':ti,ab OR 'indian bhang':ti,ab OR 'indian ganja':ti,ab OR 'bhang':ti,ab OR 'cannabis':ti,ab OR 'cannabis alkaloid':ti,ab OR 'cannabis constituent':ti,ab OR 'cannabis extract':ti,ab OR 'cannabis herba':ti,ab OR 'cannabis leaf':ti,ab OR 'cannador':ti,ab OR 'charas':ti,ab OR 'ganja':ti,ab OR 'ganjah':ti,ab OR 'hashish':ti,ab OR 'hashish oil':ti,ab OR 'hemp extract':ti,ab OR 'herba cannabis':ti,ab OR 'marihuana':ti,ab OR 'marijuana':ti,ab OR 'mexican marihuana':ti,ab OR 'medical cannabis'/exp OR 'medical cannabis':ti,ab OR 'medical marihuana':ti,ab OR 'medical marijuana':ti,ab OR 'medicinal cannabis':ti,ab OR 'medicinal marihuana':ti,ab OR 'medicinal marijuana':ti,ab OR 'marijuana treatment':ti,ab OR 'dronabinol'/exp OR '1 trans delta 9 tetrahydrocannabinol':ti,ab OR 'delta 1 3, 4 trans tetrahydrocannabinol':ti,ab OR 'delta 1 tetrahydrocannabinol':ti,ab OR 'delta 1 trans tetrahydrocannabinol':ti,ab OR 'delta 1, 2 tetrahydrocannabinol':ti,ab OR 'delta 9 tetrahydrocannabinol':ti,ab OR 'delta 9 trans tetrahydrocannabinol':ti,ab OR 'delta1 3, 4 trans tetrahydrocannabinol':ti,ab OR 'delta1 cis tetrahydrocannabinol':ti,ab OR 'delta1 tetrahydrocannabinol':ti,ab OR 'delta1 thc':ti,ab OR 'delta1 trans tetrahydrocannabinol':ti,ab OR 'delta9 tetrahydro cannabinol':ti,ab OR 'delta9 tetrahydrocannabinol':ti,ab OR 'delta9 trans tetrahydrocannabinol':ti,ab OR 'dronabinol':ti,ab OR 'ea 1477':ti,ab OR 'ea1477':ti,ab OR 'l delta 9 trans tetrahydrocannabinol':ti,ab OR 'levo delta 1 tetrahydrocannabinol':ti,ab OR 'levo delta 9 tetrahydrocannabinol':ti,ab OR 'marinol':ti,ab OR 'qcd 84924':ti,ab OR 'syndros':ti,ab OR 'tetrahydrocannabinol 1 ene':ti,ab OR 'tetrahydrocannabinol delta1':ti,ab OR 'tetrahydrocannabinol delta9':ti,ab OR 'tetranabinex':ti,ab OR 'trans delta 9 tetrahydrocannabinol':ti,ab OR 'u1 tetrahydrocannabinol':ti,ab OR 'u9 tetrahydrocannabinol':ti,ab OR thc:ti,ab OR 'tetrahydrocannabinol'/exp OR '1 trans delta 8 tetrahydrocannabinol':ti,ab OR '7, 8, 9, 10 tetrahydrocannabinol':ti,ab OR 'delta 2 tetrahydrocannabinol':ti,ab OR 'delta 3 tetrahydrocannabinol':ti,ab OR 'delta 5 tetrahydrocannabinol':ti,ab OR 'delta 6a, 10a tetrahydrocannabinol':ti,ab OR 'delta tetrahydrocannabinol':ti,ab OR 'delta3 tetrahydrocannabinol':ti,ab OR 'delta3 thc':ti,ab OR 'sp 104':ti,ab OR 'tetrahydro cannabinol':ti,ab OR 'tetrahydrocannabinal':ti,ab OR 'tetrahydrocannabinol':ti,ab OR 'tetrahydrocannabinol isomer':ti,ab OR 'tetrahydrocannabiol':ti,ab OR 'trans tetrahydrocannabinol':ti,ab OR 'synthetic cannabinoid'/exp OR 'synthetic cannabinoid':ti,ab OR scb:ti,ab) AND [english]/lim AND [27-5-2016]/sd NOT [23-9-2019]/sd | | 91 |  |
|  |  |  |  |
| **Autism** |  |  |  |
| ('autism'/exp OR 'kanner syndrome':ti,ab OR 'pdd (pervasive developmental disorder)':ti,ab OR 'autism':ti,ab OR 'autism, early infantile':ti,ab OR 'autism, infantile':ti,ab OR 'autistic child':ti,ab OR 'autistic children':ti,ab OR 'autistic disorder':ti,ab OR 'child development disorders, pervasive':ti,ab OR 'childhood autism':ti,ab OR 'classical autism':ti,ab OR 'early infantile autism':ti,ab OR 'infantile autism':ti,ab OR 'infantile autism, early':ti,ab OR 'pervasive developmental disorder':ti,ab OR 'pervasive developmental disorders':ti,ab OR 'typical autism':ti,ab OR autistic:ti,ab OR 'autistic spectrum disorder':ti,ab OR 'autism spectrum disorder':ti,ab) AND ('cannabinoid'/exp OR 'cannabinoid':ti,ab OR 'cannabinoids':ti,ab OR 'cannabis'/exp OR 'cannabis sativa extract':ti,ab OR 'cannabis sativa leaf':ti,ab OR 'cannabis sativa resin':ti,ab OR 'indian bhang':ti,ab OR 'indian ganja':ti,ab OR 'bhang':ti,ab OR 'cannabis':ti,ab OR 'cannabis alkaloid':ti,ab OR 'cannabis constituent':ti,ab OR 'cannabis extract':ti,ab OR 'cannabis herba':ti,ab OR 'cannabis leaf':ti,ab OR 'cannador':ti,ab OR 'charas':ti,ab OR 'ganja':ti,ab OR 'ganjah':ti,ab OR 'hashish':ti,ab OR 'hashish oil':ti,ab OR 'hemp extract':ti,ab OR 'herba cannabis':ti,ab OR 'marihuana':ti,ab OR 'marijuana':ti,ab OR 'mexican marihuana':ti,ab OR 'medical cannabis'/exp OR 'medical cannabis':ti,ab OR 'medical marihuana':ti,ab OR 'medical marijuana':ti,ab OR 'medicinal cannabis':ti,ab OR 'medicinal marihuana':ti,ab OR 'medicinal marijuana':ti,ab OR 'marijuana treatment':ti,ab OR 'dronabinol'/exp OR '1 trans delta 9 tetrahydrocannabinol':ti,ab OR 'delta 1 3, 4 trans tetrahydrocannabinol':ti,ab OR 'delta 1 tetrahydrocannabinol':ti,ab OR 'delta 1 trans tetrahydrocannabinol':ti,ab OR 'delta 1, 2 tetrahydrocannabinol':ti,ab OR 'delta 9 tetrahydrocannabinol':ti,ab OR 'delta 9 trans tetrahydrocannabinol':ti,ab OR 'delta1 3, 4 trans tetrahydrocannabinol':ti,ab OR 'delta1 cis tetrahydrocannabinol':ti,ab OR 'delta1 tetrahydrocannabinol':ti,ab OR 'delta1 thc':ti,ab OR 'delta1 trans tetrahydrocannabinol':ti,ab OR 'delta9 tetrahydro cannabinol':ti,ab OR 'delta9 tetrahydrocannabinol':ti,ab OR 'delta9 trans tetrahydrocannabinol':ti,ab OR 'dronabinol':ti,ab OR 'ea 1477':ti,ab OR 'ea1477':ti,ab OR 'l delta 9 trans tetrahydrocannabinol':ti,ab OR 'levo delta 1 tetrahydrocannabinol':ti,ab OR 'levo delta 9 tetrahydrocannabinol':ti,ab OR 'marinol':ti,ab OR 'qcd 84924':ti,ab OR 'syndros':ti,ab OR 'tetrahydrocannabinol 1 ene':ti,ab OR 'tetrahydrocannabinol delta1':ti,ab OR 'tetrahydrocannabinol delta9':ti,ab OR 'tetranabinex':ti,ab OR 'trans delta 9 tetrahydrocannabinol':ti,ab OR 'u1 tetrahydrocannabinol':ti,ab OR 'u9 tetrahydrocannabinol':ti,ab OR thc:ti,ab OR 'tetrahydrocannabinol'/exp OR '1 trans delta 8 tetrahydrocannabinol':ti,ab OR '7, 8, 9, 10 tetrahydrocannabinol':ti,ab OR 'delta 2 tetrahydrocannabinol':ti,ab OR 'delta 3 tetrahydrocannabinol':ti,ab OR 'delta 5 tetrahydrocannabinol':ti,ab OR 'delta 6a, 10a tetrahydrocannabinol':ti,ab OR 'delta tetrahydrocannabinol':ti,ab OR 'delta3 tetrahydrocannabinol':ti,ab OR 'delta3 thc':ti,ab OR 'sp 104':ti,ab OR 'tetrahydro cannabinol':ti,ab OR 'tetrahydrocannabinal':ti,ab OR 'tetrahydrocannabinol':ti,ab OR 'tetrahydrocannabinol isomer':ti,ab OR 'tetrahydrocannabiol':ti,ab OR 'trans tetrahydrocannabinol':ti,ab OR 'synthetic cannabinoid'/exp OR 'synthetic cannabinoid':ti,ab OR scb:ti,ab OR (('spice':ti,ab OR 'spices':ti,ab OR 'k2':ti,ab) AND ('cannabinoid'/exp OR 'cannabinoid':ti,ab OR 'cannabinoids':ti,ab OR 'cannabis'/exp OR 'cannabis sativa extract':ti,ab OR 'cannabis sativa leaf':ti,ab OR 'cannabis sativa resin':ti,ab OR 'indian bhang':ti,ab OR 'indian ganja':ti,ab OR 'bhang':ti,ab OR 'cannabis':ti,ab OR 'cannabis alkaloid':ti,ab OR 'cannabis constituent':ti,ab OR 'cannabis extract':ti,ab OR 'cannabis herba':ti,ab OR 'cannabis leaf':ti,ab OR 'cannador':ti,ab OR 'charas':ti,ab OR 'ganja':ti,ab OR 'ganjah':ti,ab OR 'hashish':ti,ab OR 'hashish oil':ti,ab OR 'hemp extract':ti,ab OR 'herba cannabis':ti,ab OR 'marihuana':ti,ab OR 'marijuana':ti,ab OR 'mexican marihuana':ti,ab OR 'medical cannabis'/exp OR 'medical cannabis':ti,ab OR 'medical marihuana':ti,ab OR 'medical marijuana':ti,ab OR 'medicinal cannabis':ti,ab OR 'medicinal marihuana':ti,ab OR 'medicinal marijuana':ti,ab OR 'marijuana treatment':ti,ab OR 'dronabinol'/exp OR '1 trans delta 9 tetrahydrocannabinol':ti,ab OR 'delta 1 3, 4 trans tetrahydrocannabinol':ti,ab OR 'delta 1 tetrahydrocannabinol':ti,ab OR 'delta 1 trans tetrahydrocannabinol':ti,ab OR 'delta 1, 2 tetrahydrocannabinol':ti,ab OR 'delta 9 tetrahydrocannabinol':ti,ab OR 'delta 9 trans tetrahydrocannabinol':ti,ab OR 'delta1 3, 4 trans tetrahydrocannabinol':ti,ab OR 'delta1 cis tetrahydrocannabinol':ti,ab OR 'delta1 tetrahydrocannabinol':ti,ab OR 'delta1 thc':ti,ab OR 'delta1 trans tetrahydrocannabinol':ti,ab OR 'delta9 tetrahydro cannabinol':ti,ab OR 'delta9 tetrahydrocannabinol':ti,ab OR 'delta9 trans tetrahydrocannabinol':ti,ab OR 'dronabinol':ti,ab OR 'ea 1477':ti,ab OR 'ea1477':ti,ab OR 'l delta 9 trans tetrahydrocannabinol':ti,ab OR 'levo delta 1 tetrahydrocannabinol':ti,ab OR 'levo delta 9 tetrahydrocannabinol':ti,ab OR 'marinol':ti,ab OR 'qcd 84924':ti,ab OR 'syndros':ti,ab OR 'tetrahydrocannabinol 1 ene':ti,ab OR 'tetrahydrocannabinol delta1':ti,ab OR 'tetrahydrocannabinol delta9':ti,ab OR 'tetranabinex':ti,ab OR 'trans delta 9 tetrahydrocannabinol':ti,ab OR 'u1 tetrahydrocannabinol':ti,ab OR 'u9 tetrahydrocannabinol':ti,ab OR thc:ti,ab OR 'tetrahydrocannabinol'/exp OR '1 trans delta 8 tetrahydrocannabinol':ti,ab OR '7, 8, 9, 10 tetrahydrocannabinol':ti,ab OR 'delta 2 tetrahydrocannabinol':ti,ab OR 'delta 3 tetrahydrocannabinol':ti,ab OR 'delta 5 tetrahydrocannabinol':ti,ab OR 'delta 6a, 10a tetrahydrocannabinol':ti,ab OR 'delta tetrahydrocannabinol':ti,ab OR 'delta3 tetrahydrocannabinol':ti,ab OR 'delta3 thc':ti,ab OR 'sp 104':ti,ab OR 'tetrahydro cannabinol':ti,ab OR 'tetrahydrocannabinal':ti,ab OR 'tetrahydrocannabinol':ti,ab OR 'tetrahydrocannabinol isomer':ti,ab OR 'tetrahydrocannabiol':ti,ab OR 'trans tetrahydrocannabinol':ti,ab OR 'synthetic cannabinoid'/exp OR 'synthetic cannabinoid':ti,ab OR scb:ti,ab)) | | 149 |  |
|  |  |  |  |
| **Cancer** |  |  |  |
| ('malignant neoplasm'/exp OR 'cancer':ti,ab OR 'cancers':ti,ab OR 'malignant neoplasia':ti,ab OR 'malignant neoplasm':ti,ab OR 'malignant neoplastic disease':ti,ab OR 'malignant tumor':ti,ab OR 'malignant tumour':ti,ab OR 'neoplasia, malignant':ti,ab OR 'tumor, malignant':ti,ab OR 'tumour, malignant':ti,ab) AND ('cannabinoid'/exp OR 'cannabinoid':ti,ab OR 'cannabinoids':ti,ab OR 'cannabis'/exp OR 'cannabis sativa extract':ti,ab OR 'cannabis sativa leaf':ti,ab OR 'cannabis sativa resin':ti,ab OR 'indian bhang':ti,ab OR 'indian ganja':ti,ab OR 'bhang':ti,ab OR 'cannabis':ti,ab OR 'cannabis alkaloid':ti,ab OR 'cannabis constituent':ti,ab OR 'cannabis extract':ti,ab OR 'cannabis herba':ti,ab OR 'cannabis leaf':ti,ab OR 'cannador':ti,ab OR 'charas':ti,ab OR 'ganja':ti,ab OR 'ganjah':ti,ab OR 'hashish':ti,ab OR 'hashish oil':ti,ab OR 'hemp extract':ti,ab OR 'herba cannabis':ti,ab OR 'marihuana':ti,ab OR 'marijuana':ti,ab OR 'mexican marihuana':ti,ab OR 'medical cannabis'/exp OR 'medical cannabis':ti,ab OR 'medical marihuana':ti,ab OR 'medical marijuana':ti,ab OR 'medicinal cannabis':ti,ab OR 'medicinal marihuana':ti,ab OR 'medicinal marijuana':ti,ab OR 'marijuana treatment':ti,ab OR 'dronabinol'/exp OR '1 trans delta 9 tetrahydrocannabinol':ti,ab OR 'delta 1 3, 4 trans tetrahydrocannabinol':ti,ab OR 'delta 1 tetrahydrocannabinol':ti,ab OR 'delta 1 trans tetrahydrocannabinol':ti,ab OR 'delta 1, 2 tetrahydrocannabinol':ti,ab OR 'delta 9 tetrahydrocannabinol':ti,ab OR 'delta 9 trans tetrahydrocannabinol':ti,ab OR 'delta1 3, 4 trans tetrahydrocannabinol':ti,ab OR 'delta1 cis tetrahydrocannabinol':ti,ab OR 'delta1 tetrahydrocannabinol':ti,ab OR 'delta1 thc':ti,ab OR 'delta1 trans tetrahydrocannabinol':ti,ab OR 'delta9 tetrahydro cannabinol':ti,ab OR 'delta9 tetrahydrocannabinol':ti,ab OR 'delta9 trans tetrahydrocannabinol':ti,ab OR 'dronabinol':ti,ab OR 'ea 1477':ti,ab OR 'ea1477':ti,ab OR 'l delta 9 trans tetrahydrocannabinol':ti,ab OR 'levo delta 1 tetrahydrocannabinol':ti,ab OR 'levo delta 9 tetrahydrocannabinol':ti,ab OR 'marinol':ti,ab OR 'qcd 84924':ti,ab OR 'syndros':ti,ab OR 'tetrahydrocannabinol 1 ene':ti,ab OR 'tetrahydrocannabinol delta1':ti,ab OR 'tetrahydrocannabinol delta9':ti,ab OR 'tetranabinex':ti,ab OR 'trans delta 9 tetrahydrocannabinol':ti,ab OR 'u1 tetrahydrocannabinol':ti,ab OR 'u9 tetrahydrocannabinol':ti,ab OR thc:ti,ab OR 'tetrahydrocannabinol'/exp OR '1 trans delta 8 tetrahydrocannabinol':ti,ab OR '7, 8, 9, 10 tetrahydrocannabinol':ti,ab OR 'delta 2 tetrahydrocannabinol':ti,ab OR 'delta 3 tetrahydrocannabinol':ti,ab OR 'delta 5 tetrahydrocannabinol':ti,ab OR 'delta 6a, 10a tetrahydrocannabinol':ti,ab OR 'delta tetrahydrocannabinol':ti,ab OR 'delta3 tetrahydrocannabinol':ti,ab OR 'delta3 thc':ti,ab OR 'sp 104':ti,ab OR 'tetrahydro cannabinol':ti,ab OR 'tetrahydrocannabinal':ti,ab OR 'tetrahydrocannabinol':ti,ab OR 'tetrahydrocannabinol isomer':ti,ab OR 'tetrahydrocannabiol':ti,ab OR 'trans tetrahydrocannabinol':ti,ab OR 'synthetic cannabinoid'/exp OR 'synthetic cannabinoid':ti,ab OR scb:ti,ab OR (('spice':ti,ab OR 'spices':ti,ab OR 'k2':ti,ab) AND ('cannabinoid'/exp OR 'cannabinoid':ti,ab OR 'cannabinoids':ti,ab OR 'cannabis'/exp OR 'cannabis sativa extract':ti,ab OR 'cannabis sativa leaf':ti,ab OR 'cannabis sativa resin':ti,ab OR 'indian bhang':ti,ab OR 'indian ganja':ti,ab OR 'bhang':ti,ab OR 'cannabis':ti,ab OR 'cannabis alkaloid':ti,ab OR 'cannabis constituent':ti,ab OR 'cannabis extract':ti,ab OR 'cannabis herba':ti,ab OR 'cannabis leaf':ti,ab OR 'cannador':ti,ab OR 'charas':ti,ab OR 'ganja':ti,ab OR 'ganjah':ti,ab OR 'hashish':ti,ab OR 'hashish oil':ti,ab OR 'hemp extract':ti,ab OR 'herba cannabis':ti,ab OR 'marihuana':ti,ab OR 'marijuana':ti,ab OR 'mexican marihuana':ti,ab OR 'medical cannabis'/exp OR 'medical cannabis':ti,ab OR 'medical marihuana':ti,ab OR 'medical marijuana':ti,ab OR 'medicinal cannabis':ti,ab OR 'medicinal marihuana':ti,ab OR 'medicinal marijuana':ti,ab OR 'marijuana treatment':ti,ab OR 'dronabinol'/exp OR '1 trans delta 9 tetrahydrocannabinol':ti,ab OR 'delta 1 3, 4 trans tetrahydrocannabinol':ti,ab OR 'delta 1 tetrahydrocannabinol':ti,ab OR 'delta 1 trans tetrahydrocannabinol':ti,ab OR 'delta 1, 2 tetrahydrocannabinol':ti,ab OR 'delta 9 tetrahydrocannabinol':ti,ab OR 'delta 9 trans tetrahydrocannabinol':ti,ab OR 'delta1 3, 4 trans tetrahydrocannabinol':ti,ab OR 'delta1 cis tetrahydrocannabinol':ti,ab OR 'delta1 tetrahydrocannabinol':ti,ab OR 'delta1 thc':ti,ab OR 'delta1 trans tetrahydrocannabinol':ti,ab OR 'delta9 tetrahydro cannabinol':ti,ab OR 'delta9 tetrahydrocannabinol':ti,ab OR 'delta9 trans tetrahydrocannabinol':ti,ab OR 'dronabinol':ti,ab OR 'ea 1477':ti,ab OR 'ea1477':ti,ab OR 'l delta 9 trans tetrahydrocannabinol':ti,ab OR 'levo delta 1 tetrahydrocannabinol':ti,ab OR 'levo delta 9 tetrahydrocannabinol':ti,ab OR 'marinol':ti,ab OR 'qcd 84924':ti,ab OR 'syndros':ti,ab OR 'tetrahydrocannabinol 1 ene':ti,ab OR 'tetrahydrocannabinol delta1':ti,ab OR 'tetrahydrocannabinol delta9':ti,ab OR 'tetranabinex':ti,ab OR 'trans delta 9 tetrahydrocannabinol':ti,ab OR 'u1 tetrahydrocannabinol':ti,ab OR 'u9 tetrahydrocannabinol':ti,ab OR thc:ti,ab OR 'tetrahydrocannabinol'/exp OR '1 trans delta 8 tetrahydrocannabinol':ti,ab OR '7, 8, 9, 10 tetrahydrocannabinol':ti,ab OR 'delta 2 tetrahydrocannabinol':ti,ab OR 'delta 3 tetrahydrocannabinol':ti,ab OR 'delta 5 tetrahydrocannabinol':ti,ab OR 'delta 6a, 10a tetrahydrocannabinol':ti,ab OR 'delta tetrahydrocannabinol':ti,ab OR 'delta3 tetrahydrocannabinol':ti,ab OR 'delta3 thc':ti,ab OR 'sp 104':ti,ab OR 'tetrahydro cannabinol':ti,ab OR 'tetrahydrocannabinal':ti,ab OR 'tetrahydrocannabinol':ti,ab OR 'tetrahydrocannabinol isomer':ti,ab OR 'tetrahydrocannabiol':ti,ab OR 'trans tetrahydrocannabinol':ti,ab OR 'synthetic cannabinoid'/exp OR 'synthetic cannabinoid':ti,ab OR scb:ti,ab)) | | 1233 |  |
|  |  |  |  |
| **Chronic Non-Malignant Pain** |  |  |  |
| ('chronic nonmalignant pain'/exp OR 'chronic nonmalignant pain':ti,ab OR 'chronic pain'/exp OR 'chronic intractable pain':ti,ab OR 'chronic pain':ti,ab OR 'pain, chronic':ti,ab OR 'chronic pain syndrome'/exp) AND ('cannabinoid'/exp OR 'cannabinoid':ti,ab OR 'cannabinoids':ti,ab OR 'cannabis'/exp OR 'cannabis sativa extract':ti,ab OR 'cannabis sativa leaf':ti,ab OR 'cannabis sativa resin':ti,ab OR 'indian bhang':ti,ab OR 'indian ganja':ti,ab OR 'bhang':ti,ab OR 'cannabis':ti,ab OR 'cannabis alkaloid':ti,ab OR 'cannabis constituent':ti,ab OR 'cannabis extract':ti,ab OR 'cannabis herba':ti,ab OR 'cannabis leaf':ti,ab OR 'cannador':ti,ab OR 'charas':ti,ab OR 'ganja':ti,ab OR 'ganjah':ti,ab OR 'hashish':ti,ab OR 'hashish oil':ti,ab OR 'hemp extract':ti,ab OR 'herba cannabis':ti,ab OR 'marihuana':ti,ab OR 'marijuana':ti,ab OR 'mexican marihuana':ti,ab OR 'medical cannabis'/exp OR 'medical cannabis':ti,ab OR 'medical marihuana':ti,ab OR 'medical marijuana':ti,ab OR 'medicinal cannabis':ti,ab OR 'medicinal marihuana':ti,ab OR 'medicinal marijuana':ti,ab OR 'marijuana treatment':ti,ab OR 'dronabinol'/exp OR '1 trans delta 9 tetrahydrocannabinol':ti,ab OR 'delta 1 3, 4 trans tetrahydrocannabinol':ti,ab OR 'delta 1 tetrahydrocannabinol':ti,ab OR 'delta 1 trans tetrahydrocannabinol':ti,ab OR 'delta 1, 2 tetrahydrocannabinol':ti,ab OR 'delta 9 tetrahydrocannabinol':ti,ab OR 'delta 9 trans tetrahydrocannabinol':ti,ab OR 'delta1 3, 4 trans tetrahydrocannabinol':ti,ab OR 'delta1 cis tetrahydrocannabinol':ti,ab OR 'delta1 tetrahydrocannabinol':ti,ab OR 'delta1 thc':ti,ab OR 'delta1 trans tetrahydrocannabinol':ti,ab OR 'delta9 tetrahydro cannabinol':ti,ab OR 'delta9 tetrahydrocannabinol':ti,ab OR 'delta9 trans tetrahydrocannabinol':ti,ab OR 'dronabinol':ti,ab OR 'ea 1477':ti,ab OR 'ea1477':ti,ab OR 'l delta 9 trans tetrahydrocannabinol':ti,ab OR 'levo delta 1 tetrahydrocannabinol':ti,ab OR 'levo delta 9 tetrahydrocannabinol':ti,ab OR 'marinol':ti,ab OR 'qcd 84924':ti,ab OR 'syndros':ti,ab OR 'tetrahydrocannabinol 1 ene':ti,ab OR 'tetrahydrocannabinol delta1':ti,ab OR 'tetrahydrocannabinol delta9':ti,ab OR 'tetranabinex':ti,ab OR 'trans delta 9 tetrahydrocannabinol':ti,ab OR 'u1 tetrahydrocannabinol':ti,ab OR 'u9 tetrahydrocannabinol':ti,ab OR thc:ti,ab OR 'tetrahydrocannabinol'/exp OR '1 trans delta 8 tetrahydrocannabinol':ti,ab OR '7, 8, 9, 10 tetrahydrocannabinol':ti,ab OR 'delta 2 tetrahydrocannabinol':ti,ab OR 'delta 3 tetrahydrocannabinol':ti,ab OR 'delta 5 tetrahydrocannabinol':ti,ab OR 'delta 6a, 10a tetrahydrocannabinol':ti,ab OR 'delta tetrahydrocannabinol':ti,ab OR 'delta3 tetrahydrocannabinol':ti,ab OR 'delta3 thc':ti,ab OR 'sp 104':ti,ab OR 'tetrahydro cannabinol':ti,ab OR 'tetrahydrocannabinal':ti,ab OR 'tetrahydrocannabinol':ti,ab OR 'tetrahydrocannabinol isomer':ti,ab OR 'tetrahydrocannabiol':ti,ab OR 'trans tetrahydrocannabinol':ti,ab OR 'synthetic cannabinoid'/exp OR 'synthetic cannabinoid':ti,ab OR scb:ti,ab OR (('spice':ti,ab OR 'spices':ti,ab OR 'k2':ti,ab) AND ('cannabinoid'/exp OR 'cannabinoid':ti,ab OR 'cannabinoids':ti,ab OR 'cannabis'/exp OR 'cannabis sativa extract':ti,ab OR 'cannabis sativa leaf':ti,ab OR 'cannabis sativa resin':ti,ab OR 'indian bhang':ti,ab OR 'indian ganja':ti,ab OR 'bhang':ti,ab OR 'cannabis':ti,ab OR 'cannabis alkaloid':ti,ab OR 'cannabis constituent':ti,ab OR 'cannabis extract':ti,ab OR 'cannabis herba':ti,ab OR 'cannabis leaf':ti,ab OR 'cannador':ti,ab OR 'charas':ti,ab OR 'ganja':ti,ab OR 'ganjah':ti,ab OR 'hashish':ti,ab OR 'hashish oil':ti,ab OR 'hemp extract':ti,ab OR 'herba cannabis':ti,ab OR 'marihuana':ti,ab OR 'marijuana':ti,ab OR 'mexican marihuana':ti,ab OR 'medical cannabis'/exp OR 'medical cannabis':ti,ab OR 'medical marihuana':ti,ab OR 'medical marijuana':ti,ab OR 'medicinal cannabis':ti,ab OR 'medicinal marihuana':ti,ab OR 'medicinal marijuana':ti,ab OR 'marijuana treatment':ti,ab OR 'dronabinol'/exp OR '1 trans delta 9 tetrahydrocannabinol':ti,ab OR 'delta 1 3, 4 trans tetrahydrocannabinol':ti,ab OR 'delta 1 tetrahydrocannabinol':ti,ab OR 'delta 1 trans tetrahydrocannabinol':ti,ab OR 'delta 1, 2 tetrahydrocannabinol':ti,ab OR 'delta 9 tetrahydrocannabinol':ti,ab OR 'delta 9 trans tetrahydrocannabinol':ti,ab OR 'delta1 3, 4 trans tetrahydrocannabinol':ti,ab OR 'delta1 cis tetrahydrocannabinol':ti,ab OR 'delta1 tetrahydrocannabinol':ti,ab OR 'delta1 thc':ti,ab OR 'delta1 trans tetrahydrocannabinol':ti,ab OR 'delta9 tetrahydro cannabinol':ti,ab OR 'delta9 tetrahydrocannabinol':ti,ab OR 'delta9 trans tetrahydrocannabinol':ti,ab OR 'dronabinol':ti,ab OR 'ea 1477':ti,ab OR 'ea1477':ti,ab OR 'l delta 9 trans tetrahydrocannabinol':ti,ab OR 'levo delta 1 tetrahydrocannabinol':ti,ab OR 'levo delta 9 tetrahydrocannabinol':ti,ab OR 'marinol':ti,ab OR 'qcd 84924':ti,ab OR 'syndros':ti,ab OR 'tetrahydrocannabinol 1 ene':ti,ab OR 'tetrahydrocannabinol delta1':ti,ab OR 'tetrahydrocannabinol delta9':ti,ab OR 'tetranabinex':ti,ab OR 'trans delta 9 tetrahydrocannabinol':ti,ab OR 'u1 tetrahydrocannabinol':ti,ab OR 'u9 tetrahydrocannabinol':ti,ab OR thc:ti,ab OR 'tetrahydrocannabinol'/exp OR '1 trans delta 8 tetrahydrocannabinol':ti,ab OR '7, 8, 9, 10 tetrahydrocannabinol':ti,ab OR 'delta 2 tetrahydrocannabinol':ti,ab OR 'delta 3 tetrahydrocannabinol':ti,ab OR 'delta 5 tetrahydrocannabinol':ti,ab OR 'delta 6a, 10a tetrahydrocannabinol':ti,ab OR 'delta tetrahydrocannabinol':ti,ab OR 'delta3 tetrahydrocannabinol':ti,ab OR 'delta3 thc':ti,ab OR 'sp 104':ti,ab OR 'tetrahydro cannabinol':ti,ab OR 'tetrahydrocannabinal':ti,ab OR 'tetrahydrocannabinol':ti,ab OR 'tetrahydrocannabinol isomer':ti,ab OR 'tetrahydrocannabiol':ti,ab OR 'trans tetrahydrocannabinol':ti,ab OR 'synthetic cannabinoid'/exp OR 'synthetic cannabinoid':ti,ab OR scb:ti,ab)) | | 666 |  |
|  |  |  |  |
| **Crohns Disease** |  |  |  |
| ('crohn disease'/exp OR 'crohn disease':ti,ab OR 'crohn`s disease':ti,ab OR 'crohns disease':ti,ab OR 'cleron disease':ti,ab OR 'enteritis regionalis':ti,ab OR 'intestinal tract, regional enteritis':ti,ab OR 'morbus crohn':ti,ab OR 'regional enteritis':ti,ab OR 'regional enterocolitis':ti,ab OR 'granulomatous enteritis':ti,ab OR ilecolitis:ti,ab OR 'terminal ileitis':ti,ab OR 'regional ileitis':ti,ab) AND ('cannabinoid'/exp OR 'cannabinoid':ti,ab OR 'cannabinoids':ti,ab OR 'cannabis'/exp OR 'cannabis sativa extract':ti,ab OR 'cannabis sativa leaf':ti,ab OR 'cannabis sativa resin':ti,ab OR 'indian bhang':ti,ab OR 'indian ganja':ti,ab OR 'bhang':ti,ab OR 'cannabis':ti,ab OR 'cannabis alkaloid':ti,ab OR 'cannabis constituent':ti,ab OR 'cannabis extract':ti,ab OR 'cannabis herba':ti,ab OR 'cannabis leaf':ti,ab OR 'cannador':ti,ab OR 'charas':ti,ab OR 'ganja':ti,ab OR 'ganjah':ti,ab OR 'hashish':ti,ab OR 'hashish oil':ti,ab OR 'hemp extract':ti,ab OR 'herba cannabis':ti,ab OR 'marihuana':ti,ab OR 'marijuana':ti,ab OR 'mexican marihuana':ti,ab OR 'medical cannabis'/exp OR 'medical cannabis':ti,ab OR 'medical marihuana':ti,ab OR 'medical marijuana':ti,ab OR 'medicinal cannabis':ti,ab OR 'medicinal marihuana':ti,ab OR 'medicinal marijuana':ti,ab OR 'marijuana treatment':ti,ab OR 'dronabinol'/exp OR '1 trans delta 9 tetrahydrocannabinol':ti,ab OR 'delta 1 3, 4 trans tetrahydrocannabinol':ti,ab OR 'delta 1 tetrahydrocannabinol':ti,ab OR 'delta 1 trans tetrahydrocannabinol':ti,ab OR 'delta 1, 2 tetrahydrocannabinol':ti,ab OR 'delta 9 tetrahydrocannabinol':ti,ab OR 'delta 9 trans tetrahydrocannabinol':ti,ab OR 'delta1 3, 4 trans tetrahydrocannabinol':ti,ab OR 'delta1 cis tetrahydrocannabinol':ti,ab OR 'delta1 tetrahydrocannabinol':ti,ab OR 'delta1 thc':ti,ab OR 'delta1 trans tetrahydrocannabinol':ti,ab OR 'delta9 tetrahydro cannabinol':ti,ab OR 'delta9 tetrahydrocannabinol':ti,ab OR 'delta9 trans tetrahydrocannabinol':ti,ab OR 'dronabinol':ti,ab OR 'ea 1477':ti,ab OR 'ea1477':ti,ab OR 'l delta 9 trans tetrahydrocannabinol':ti,ab OR 'levo delta 1 tetrahydrocannabinol':ti,ab OR 'levo delta 9 tetrahydrocannabinol':ti,ab OR 'marinol':ti,ab OR 'qcd 84924':ti,ab OR 'syndros':ti,ab OR 'tetrahydrocannabinol 1 ene':ti,ab OR 'tetrahydrocannabinol delta1':ti,ab OR 'tetrahydrocannabinol delta9':ti,ab OR 'tetranabinex':ti,ab OR 'trans delta 9 tetrahydrocannabinol':ti,ab OR 'u1 tetrahydrocannabinol':ti,ab OR 'u9 tetrahydrocannabinol':ti,ab OR thc:ti,ab OR 'tetrahydrocannabinol'/exp OR '1 trans delta 8 tetrahydrocannabinol':ti,ab OR '7, 8, 9, 10 tetrahydrocannabinol':ti,ab OR 'delta 2 tetrahydrocannabinol':ti,ab OR 'delta 3 tetrahydrocannabinol':ti,ab OR 'delta 5 tetrahydrocannabinol':ti,ab OR 'delta 6a, 10a tetrahydrocannabinol':ti,ab OR 'delta tetrahydrocannabinol':ti,ab OR 'delta3 tetrahydrocannabinol':ti,ab OR 'delta3 thc':ti,ab OR 'sp 104':ti,ab OR 'tetrahydro cannabinol':ti,ab OR 'tetrahydrocannabinal':ti,ab OR 'tetrahydrocannabinol':ti,ab OR 'tetrahydrocannabinol isomer':ti,ab OR 'tetrahydrocannabiol':ti,ab OR 'trans tetrahydrocannabinol':ti,ab OR 'synthetic cannabinoid'/exp OR 'synthetic cannabinoid':ti,ab OR scb:ti,ab OR (('spice':ti,ab OR 'spices':ti,ab OR 'k2':ti,ab) AND ('cannabinoid'/exp OR 'cannabinoid':ti,ab OR 'cannabinoids':ti,ab OR 'cannabis'/exp OR 'cannabis sativa extract':ti,ab OR 'cannabis sativa leaf':ti,ab OR 'cannabis sativa resin':ti,ab OR 'indian bhang':ti,ab OR 'indian ganja':ti,ab OR 'bhang':ti,ab OR 'cannabis':ti,ab OR 'cannabis alkaloid':ti,ab OR 'cannabis constituent':ti,ab OR 'cannabis extract':ti,ab OR 'cannabis herba':ti,ab OR 'cannabis leaf':ti,ab OR 'cannador':ti,ab OR 'charas':ti,ab OR 'ganja':ti,ab OR 'ganjah':ti,ab OR 'hashish':ti,ab OR 'hashish oil':ti,ab OR 'hemp extract':ti,ab OR 'herba cannabis':ti,ab OR 'marihuana':ti,ab OR 'marijuana':ti,ab OR 'mexican marihuana':ti,ab OR 'medical cannabis'/exp OR 'medical cannabis':ti,ab OR 'medical marihuana':ti,ab OR 'medical marijuana':ti,ab OR 'medicinal cannabis':ti,ab OR 'medicinal marihuana':ti,ab OR 'medicinal marijuana':ti,ab OR 'marijuana treatment':ti,ab OR 'dronabinol'/exp OR '1 trans delta 9 tetrahydrocannabinol':ti,ab OR 'delta 1 3, 4 trans tetrahydrocannabinol':ti,ab OR 'delta 1 tetrahydrocannabinol':ti,ab OR 'delta 1 trans tetrahydrocannabinol':ti,ab OR 'delta 1, 2 tetrahydrocannabinol':ti,ab OR 'delta 9 tetrahydrocannabinol':ti,ab OR 'delta 9 trans tetrahydrocannabinol':ti,ab OR 'delta1 3, 4 trans tetrahydrocannabinol':ti,ab OR 'delta1 cis tetrahydrocannabinol':ti,ab OR 'delta1 tetrahydrocannabinol':ti,ab OR 'delta1 thc':ti,ab OR 'delta1 trans tetrahydrocannabinol':ti,ab OR 'delta9 tetrahydro cannabinol':ti,ab OR 'delta9 tetrahydrocannabinol':ti,ab OR 'delta9 trans tetrahydrocannabinol':ti,ab OR 'dronabinol':ti,ab OR 'ea 1477':ti,ab OR 'ea1477':ti,ab OR 'l delta 9 trans tetrahydrocannabinol':ti,ab OR 'levo delta 1 tetrahydrocannabinol':ti,ab OR 'levo delta 9 tetrahydrocannabinol':ti,ab OR 'marinol':ti,ab OR 'qcd 84924':ti,ab OR 'syndros':ti,ab OR 'tetrahydrocannabinol 1 ene':ti,ab OR 'tetrahydrocannabinol delta1':ti,ab OR 'tetrahydrocannabinol delta9':ti,ab OR 'tetranabinex':ti,ab OR 'trans delta 9 tetrahydrocannabinol':ti,ab OR 'u1 tetrahydrocannabinol':ti,ab OR 'u9 tetrahydrocannabinol':ti,ab OR thc:ti,ab OR 'tetrahydrocannabinol'/exp OR '1 trans delta 8 tetrahydrocannabinol':ti,ab OR '7, 8, 9, 10 tetrahydrocannabinol':ti,ab OR 'delta 2 tetrahydrocannabinol':ti,ab OR 'delta 3 tetrahydrocannabinol':ti,ab OR 'delta 5 tetrahydrocannabinol':ti,ab OR 'delta 6a, 10a tetrahydrocannabinol':ti,ab OR 'delta tetrahydrocannabinol':ti,ab OR 'delta3 tetrahydrocannabinol':ti,ab OR 'delta3 thc':ti,ab OR 'sp 104':ti,ab OR 'tetrahydro cannabinol':ti,ab OR 'tetrahydrocannabinal':ti,ab OR 'tetrahydrocannabinol':ti,ab OR 'tetrahydrocannabinol isomer':ti,ab OR 'tetrahydrocannabiol':ti,ab OR 'trans tetrahydrocannabinol':ti,ab OR 'synthetic cannabinoid'/exp OR 'synthetic cannabinoid':ti,ab OR scb:ti,ab)) | | 107 |  |
|  |  |  |  |
| **Epilepsy** |  |  |  |
| ('epilepsy'/exp OR 'acute epilepsy':ti,ab OR 'chronic epilepsy':ti,ab OR 'comitial disease':ti,ab OR 'epilepsia':ti,ab OR 'epilepsy':ti,ab OR 'epileptic':ti,ab OR 'epileptic disorder':ti,ab OR 'epileptic syndrome':ti,ab OR 'epileptic syndromes':ti,ab OR 'falling sickness':ti,ab OR 'sickness, falling':ti,ab OR 'tardy epilepsy':ti,ab OR 'seizure, epilepsy and convulsion'/exp OR 'seizure, epilepsy and convulsion':ti,ab OR 'seizure disorder':ti,ab OR 'seizure disorders':ti,ab) AND ('cannabinoid'/exp OR 'cannabinoid':ti,ab OR 'cannabinoids':ti,ab OR 'cannabis'/exp OR 'cannabis sativa extract':ti,ab OR 'cannabis sativa leaf':ti,ab OR 'cannabis sativa resin':ti,ab OR 'indian bhang':ti,ab OR 'indian ganja':ti,ab OR 'bhang':ti,ab OR 'cannabis':ti,ab OR 'cannabis alkaloid':ti,ab OR 'cannabis constituent':ti,ab OR 'cannabis extract':ti,ab OR 'cannabis herba':ti,ab OR 'cannabis leaf':ti,ab OR 'cannador':ti,ab OR 'charas':ti,ab OR 'ganja':ti,ab OR 'ganjah':ti,ab OR 'hashish':ti,ab OR 'hashish oil':ti,ab OR 'hemp extract':ti,ab OR 'herba cannabis':ti,ab OR 'marihuana':ti,ab OR 'marijuana':ti,ab OR 'mexican marihuana':ti,ab OR 'medical cannabis'/exp OR 'medical cannabis':ti,ab OR 'medical marihuana':ti,ab OR 'medical marijuana':ti,ab OR 'medicinal cannabis':ti,ab OR 'medicinal marihuana':ti,ab OR 'medicinal marijuana':ti,ab OR 'marijuana treatment':ti,ab OR 'dronabinol'/exp OR '1 trans delta 9 tetrahydrocannabinol':ti,ab OR 'delta 1 3, 4 trans tetrahydrocannabinol':ti,ab OR 'delta 1 tetrahydrocannabinol':ti,ab OR 'delta 1 trans tetrahydrocannabinol':ti,ab OR 'delta 1, 2 tetrahydrocannabinol':ti,ab OR 'delta 9 tetrahydrocannabinol':ti,ab OR 'delta 9 trans tetrahydrocannabinol':ti,ab OR 'delta1 3, 4 trans tetrahydrocannabinol':ti,ab OR 'delta1 cis tetrahydrocannabinol':ti,ab OR 'delta1 tetrahydrocannabinol':ti,ab OR 'delta1 thc':ti,ab OR 'delta1 trans tetrahydrocannabinol':ti,ab OR 'delta9 tetrahydro cannabinol':ti,ab OR 'delta9 tetrahydrocannabinol':ti,ab OR 'delta9 trans tetrahydrocannabinol':ti,ab OR 'dronabinol':ti,ab OR 'ea 1477':ti,ab OR 'ea1477':ti,ab OR 'l delta 9 trans tetrahydrocannabinol':ti,ab OR 'levo delta 1 tetrahydrocannabinol':ti,ab OR 'levo delta 9 tetrahydrocannabinol':ti,ab OR 'marinol':ti,ab OR 'qcd 84924':ti,ab OR 'syndros':ti,ab OR 'tetrahydrocannabinol 1 ene':ti,ab OR 'tetrahydrocannabinol delta1':ti,ab OR 'tetrahydrocannabinol delta9':ti,ab OR 'tetranabinex':ti,ab OR 'trans delta 9 tetrahydrocannabinol':ti,ab OR 'u1 tetrahydrocannabinol':ti,ab OR 'u9 tetrahydrocannabinol':ti,ab OR thc:ti,ab OR 'tetrahydrocannabinol'/exp OR '1 trans delta 8 tetrahydrocannabinol':ti,ab OR '7, 8, 9, 10 tetrahydrocannabinol':ti,ab OR 'delta 2 tetrahydrocannabinol':ti,ab OR 'delta 3 tetrahydrocannabinol':ti,ab OR 'delta 5 tetrahydrocannabinol':ti,ab OR 'delta 6a, 10a tetrahydrocannabinol':ti,ab OR 'delta tetrahydrocannabinol':ti,ab OR 'delta3 tetrahydrocannabinol':ti,ab OR 'delta3 thc':ti,ab OR 'sp 104':ti,ab OR 'tetrahydro cannabinol':ti,ab OR 'tetrahydrocannabinal':ti,ab OR 'tetrahydrocannabinol':ti,ab OR 'tetrahydrocannabinol isomer':ti,ab OR 'tetrahydrocannabiol':ti,ab OR 'trans tetrahydrocannabinol':ti,ab OR 'synthetic cannabinoid'/exp OR 'synthetic cannabinoid':ti,ab OR scb:ti,ab OR (('spice':ti,ab OR 'spices':ti,ab OR 'k2':ti,ab) AND ('cannabinoid'/exp OR 'cannabinoid':ti,ab OR 'cannabinoids':ti,ab OR 'cannabis'/exp OR 'cannabis sativa extract':ti,ab OR 'cannabis sativa leaf':ti,ab OR 'cannabis sativa resin':ti,ab OR 'indian bhang':ti,ab OR 'indian ganja':ti,ab OR 'bhang':ti,ab OR 'cannabis':ti,ab OR 'cannabis alkaloid':ti,ab OR 'cannabis constituent':ti,ab OR 'cannabis extract':ti,ab OR 'cannabis herba':ti,ab OR 'cannabis leaf':ti,ab OR 'cannador':ti,ab OR 'charas':ti,ab OR 'ganja':ti,ab OR 'ganjah':ti,ab OR 'hashish':ti,ab OR 'hashish oil':ti,ab OR 'hemp extract':ti,ab OR 'herba cannabis':ti,ab OR 'marihuana':ti,ab OR 'marijuana':ti,ab OR 'mexican marihuana':ti,ab OR 'medical cannabis'/exp OR 'medical cannabis':ti,ab OR 'medical marihuana':ti,ab OR 'medical marijuana':ti,ab OR 'medicinal cannabis':ti,ab OR 'medicinal marihuana':ti,ab OR 'medicinal marijuana':ti,ab OR 'marijuana treatment':ti,ab OR 'dronabinol'/exp OR '1 trans delta 9 tetrahydrocannabinol':ti,ab OR 'delta 1 3, 4 trans tetrahydrocannabinol':ti,ab OR 'delta 1 tetrahydrocannabinol':ti,ab OR 'delta 1 trans tetrahydrocannabinol':ti,ab OR 'delta 1, 2 tetrahydrocannabinol':ti,ab OR 'delta 9 tetrahydrocannabinol':ti,ab OR 'delta 9 trans tetrahydrocannabinol':ti,ab OR 'delta1 3, 4 trans tetrahydrocannabinol':ti,ab OR 'delta1 cis tetrahydrocannabinol':ti,ab OR 'delta1 tetrahydrocannabinol':ti,ab OR 'delta1 thc':ti,ab OR 'delta1 trans tetrahydrocannabinol':ti,ab OR 'delta9 tetrahydro cannabinol':ti,ab OR 'delta9 tetrahydrocannabinol':ti,ab OR 'delta9 trans tetrahydrocannabinol':ti,ab OR 'dronabinol':ti,ab OR 'ea 1477':ti,ab OR 'ea1477':ti,ab OR 'l delta 9 trans tetrahydrocannabinol':ti,ab OR 'levo delta 1 tetrahydrocannabinol':ti,ab OR 'levo delta 9 tetrahydrocannabinol':ti,ab OR 'marinol':ti,ab OR 'qcd 84924':ti,ab OR 'syndros':ti,ab OR 'tetrahydrocannabinol 1 ene':ti,ab OR 'tetrahydrocannabinol delta1':ti,ab OR 'tetrahydrocannabinol delta9':ti,ab OR 'tetranabinex':ti,ab OR 'trans delta 9 tetrahydrocannabinol':ti,ab OR 'u1 tetrahydrocannabinol':ti,ab OR 'u9 tetrahydrocannabinol':ti,ab OR thc:ti,ab OR 'tetrahydrocannabinol'/exp OR '1 trans delta 8 tetrahydrocannabinol':ti,ab OR '7, 8, 9, 10 tetrahydrocannabinol':ti,ab OR 'delta 2 tetrahydrocannabinol':ti,ab OR 'delta 3 tetrahydrocannabinol':ti,ab OR 'delta 5 tetrahydrocannabinol':ti,ab OR 'delta 6a, 10a tetrahydrocannabinol':ti,ab OR 'delta tetrahydrocannabinol':ti,ab OR 'delta3 tetrahydrocannabinol':ti,ab OR 'delta3 thc':ti,ab OR 'sp 104':ti,ab OR 'tetrahydro cannabinol':ti,ab OR 'tetrahydrocannabinal':ti,ab OR 'tetrahydrocannabinol':ti,ab OR 'tetrahydrocannabinol isomer':ti,ab OR 'tetrahydrocannabiol':ti,ab OR 'trans tetrahydrocannabinol':ti,ab OR 'synthetic cannabinoid'/exp OR 'synthetic cannabinoid':ti,ab OR scb:ti,ab)) | | 848 |  |
|  |  |  |  |
| **Glaucoma** |  |  |  |
| ('glaucoma'/exp OR 'chronic glaucoma':ti,ab OR 'glaucoma':ti,ab OR 'intraocular hypertension'/exp OR 'eye hypertension':ti,ab OR 'hypertension, eye':ti,ab OR 'hypertension, ocular':ti,ab OR 'intraocular hypertension':ti,ab OR 'ocular hypertension':ti,ab OR 'suspect glaucoma':ti,ab) AND ('cannabinoid'/exp OR 'cannabinoid':ti,ab OR 'cannabinoids':ti,ab OR 'cannabis'/exp OR 'cannabis sativa extract':ti,ab OR 'cannabis sativa leaf':ti,ab OR 'cannabis sativa resin':ti,ab OR 'indian bhang':ti,ab OR 'indian ganja':ti,ab OR 'bhang':ti,ab OR 'cannabis':ti,ab OR 'cannabis alkaloid':ti,ab OR 'cannabis constituent':ti,ab OR 'cannabis extract':ti,ab OR 'cannabis herba':ti,ab OR 'cannabis leaf':ti,ab OR 'cannador':ti,ab OR 'charas':ti,ab OR 'ganja':ti,ab OR 'ganjah':ti,ab OR 'hashish':ti,ab OR 'hashish oil':ti,ab OR 'hemp extract':ti,ab OR 'herba cannabis':ti,ab OR 'marihuana':ti,ab OR 'marijuana':ti,ab OR 'mexican marihuana':ti,ab OR 'medical cannabis'/exp OR 'medical cannabis':ti,ab OR 'medical marihuana':ti,ab OR 'medical marijuana':ti,ab OR 'medicinal cannabis':ti,ab OR 'medicinal marihuana':ti,ab OR 'medicinal marijuana':ti,ab OR 'marijuana treatment':ti,ab OR 'dronabinol'/exp OR '1 trans delta 9 tetrahydrocannabinol':ti,ab OR 'delta 1 3, 4 trans tetrahydrocannabinol':ti,ab OR 'delta 1 tetrahydrocannabinol':ti,ab OR 'delta 1 trans tetrahydrocannabinol':ti,ab OR 'delta 1, 2 tetrahydrocannabinol':ti,ab OR 'delta 9 tetrahydrocannabinol':ti,ab OR 'delta 9 trans tetrahydrocannabinol':ti,ab OR 'delta1 3, 4 trans tetrahydrocannabinol':ti,ab OR 'delta1 cis tetrahydrocannabinol':ti,ab OR 'delta1 tetrahydrocannabinol':ti,ab OR 'delta1 thc':ti,ab OR 'delta1 trans tetrahydrocannabinol':ti,ab OR 'delta9 tetrahydro cannabinol':ti,ab OR 'delta9 tetrahydrocannabinol':ti,ab OR 'delta9 trans tetrahydrocannabinol':ti,ab OR 'dronabinol':ti,ab OR 'ea 1477':ti,ab OR 'ea1477':ti,ab OR 'l delta 9 trans tetrahydrocannabinol':ti,ab OR 'levo delta 1 tetrahydrocannabinol':ti,ab OR 'levo delta 9 tetrahydrocannabinol':ti,ab OR 'marinol':ti,ab OR 'qcd 84924':ti,ab OR 'syndros':ti,ab OR 'tetrahydrocannabinol 1 ene':ti,ab OR 'tetrahydrocannabinol delta1':ti,ab OR 'tetrahydrocannabinol delta9':ti,ab OR 'tetranabinex':ti,ab OR 'trans delta 9 tetrahydrocannabinol':ti,ab OR 'u1 tetrahydrocannabinol':ti,ab OR 'u9 tetrahydrocannabinol':ti,ab OR thc:ti,ab OR 'tetrahydrocannabinol'/exp OR '1 trans delta 8 tetrahydrocannabinol':ti,ab OR '7, 8, 9, 10 tetrahydrocannabinol':ti,ab OR 'delta 2 tetrahydrocannabinol':ti,ab OR 'delta 3 tetrahydrocannabinol':ti,ab OR 'delta 5 tetrahydrocannabinol':ti,ab OR 'delta 6a, 10a tetrahydrocannabinol':ti,ab OR 'delta tetrahydrocannabinol':ti,ab OR 'delta3 tetrahydrocannabinol':ti,ab OR 'delta3 thc':ti,ab OR 'sp 104':ti,ab OR 'tetrahydro cannabinol':ti,ab OR 'tetrahydrocannabinal':ti,ab OR 'tetrahydrocannabinol':ti,ab OR 'tetrahydrocannabinol isomer':ti,ab OR 'tetrahydrocannabiol':ti,ab OR 'trans tetrahydrocannabinol':ti,ab OR 'synthetic cannabinoid'/exp OR 'synthetic cannabinoid':ti,ab OR scb:ti,ab OR (('spice':ti,ab OR 'spices':ti,ab OR 'k2':ti,ab) AND ('cannabinoid'/exp OR 'cannabinoid':ti,ab OR 'cannabinoids':ti,ab OR 'cannabis'/exp OR 'cannabis sativa extract':ti,ab OR 'cannabis sativa leaf':ti,ab OR 'cannabis sativa resin':ti,ab OR 'indian bhang':ti,ab OR 'indian ganja':ti,ab OR 'bhang':ti,ab OR 'cannabis':ti,ab OR 'cannabis alkaloid':ti,ab OR 'cannabis constituent':ti,ab OR 'cannabis extract':ti,ab OR 'cannabis herba':ti,ab OR 'cannabis leaf':ti,ab OR 'cannador':ti,ab OR 'charas':ti,ab OR 'ganja':ti,ab OR 'ganjah':ti,ab OR 'hashish':ti,ab OR 'hashish oil':ti,ab OR 'hemp extract':ti,ab OR 'herba cannabis':ti,ab OR 'marihuana':ti,ab OR 'marijuana':ti,ab OR 'mexican marihuana':ti,ab OR 'medical cannabis'/exp OR 'medical cannabis':ti,ab OR 'medical marihuana':ti,ab OR 'medical marijuana':ti,ab OR 'medicinal cannabis':ti,ab OR 'medicinal marihuana':ti,ab OR 'medicinal marijuana':ti,ab OR 'marijuana treatment':ti,ab OR 'dronabinol'/exp OR '1 trans delta 9 tetrahydrocannabinol':ti,ab OR 'delta 1 3, 4 trans tetrahydrocannabinol':ti,ab OR 'delta 1 tetrahydrocannabinol':ti,ab OR 'delta 1 trans tetrahydrocannabinol':ti,ab OR 'delta 1, 2 tetrahydrocannabinol':ti,ab OR 'delta 9 tetrahydrocannabinol':ti,ab OR 'delta 9 trans tetrahydrocannabinol':ti,ab OR 'delta1 3, 4 trans tetrahydrocannabinol':ti,ab OR 'delta1 cis tetrahydrocannabinol':ti,ab OR 'delta1 tetrahydrocannabinol':ti,ab OR 'delta1 thc':ti,ab OR 'delta1 trans tetrahydrocannabinol':ti,ab OR 'delta9 tetrahydro cannabinol':ti,ab OR 'delta9 tetrahydrocannabinol':ti,ab OR 'delta9 trans tetrahydrocannabinol':ti,ab OR 'dronabinol':ti,ab OR 'ea 1477':ti,ab OR 'ea1477':ti,ab OR 'l delta 9 trans tetrahydrocannabinol':ti,ab OR 'levo delta 1 tetrahydrocannabinol':ti,ab OR 'levo delta 9 tetrahydrocannabinol':ti,ab OR 'marinol':ti,ab OR 'qcd 84924':ti,ab OR 'syndros':ti,ab OR 'tetrahydrocannabinol 1 ene':ti,ab OR 'tetrahydrocannabinol delta1':ti,ab OR 'tetrahydrocannabinol delta9':ti,ab OR 'tetranabinex':ti,ab OR 'trans delta 9 tetrahydrocannabinol':ti,ab OR 'u1 tetrahydrocannabinol':ti,ab OR 'u9 tetrahydrocannabinol':ti,ab OR thc:ti,ab OR 'tetrahydrocannabinol'/exp OR '1 trans delta 8 tetrahydrocannabinol':ti,ab OR '7, 8, 9, 10 tetrahydrocannabinol':ti,ab OR 'delta 2 tetrahydrocannabinol':ti,ab OR 'delta 3 tetrahydrocannabinol':ti,ab OR 'delta 5 tetrahydrocannabinol':ti,ab OR 'delta 6a, 10a tetrahydrocannabinol':ti,ab OR 'delta tetrahydrocannabinol':ti,ab OR 'delta3 tetrahydrocannabinol':ti,ab OR 'delta3 thc':ti,ab OR 'sp 104':ti,ab OR 'tetrahydro cannabinol':ti,ab OR 'tetrahydrocannabinal':ti,ab OR 'tetrahydrocannabinol':ti,ab OR 'tetrahydrocannabinol isomer':ti,ab OR 'tetrahydrocannabiol':ti,ab OR 'trans tetrahydrocannabinol':ti,ab OR 'synthetic cannabinoid'/exp OR 'synthetic cannabinoid':ti,ab OR scb:ti,ab)) | | 119 |  |
|  |  |  |  |
| **HIV/AIDS** |  |  |  |
| ('human immunodeficiency virus infection'/exp OR 'hiv infection':ti,ab OR 'hiv infections':ti,ab OR 'human immunodeficiency virus infection':ti,ab OR 'hiv seropositivity':ti,ab OR 'human immunodeficiency virus encephalopathy':ti,ab OR 'acquired immune deficiency syndrome'/exp OR 'aids':ti,ab OR 'acquired immune deficiency syndrome':ti,ab OR 'acquired immunodeficiency syndrome':ti,ab OR 'immunodeficiency, acquired':ti,ab) AND ('cannabinoid'/exp OR 'cannabinoid':ti,ab OR 'cannabinoids':ti,ab OR 'cannabis'/exp OR 'cannabis sativa extract':ti,ab OR 'cannabis sativa leaf':ti,ab OR 'cannabis sativa resin':ti,ab OR 'indian bhang':ti,ab OR 'indian ganja':ti,ab OR 'bhang':ti,ab OR 'cannabis':ti,ab OR 'cannabis alkaloid':ti,ab OR 'cannabis constituent':ti,ab OR 'cannabis extract':ti,ab OR 'cannabis herba':ti,ab OR 'cannabis leaf':ti,ab OR 'cannador':ti,ab OR 'charas':ti,ab OR 'ganja':ti,ab OR 'ganjah':ti,ab OR 'hashish':ti,ab OR 'hashish oil':ti,ab OR 'hemp extract':ti,ab OR 'herba cannabis':ti,ab OR 'marihuana':ti,ab OR 'marijuana':ti,ab OR 'mexican marihuana':ti,ab OR 'medical cannabis'/exp OR 'medical cannabis':ti,ab OR 'medical marihuana':ti,ab OR 'medical marijuana':ti,ab OR 'medicinal cannabis':ti,ab OR 'medicinal marihuana':ti,ab OR 'medicinal marijuana':ti,ab OR 'marijuana treatment':ti,ab OR 'dronabinol'/exp OR '1 trans delta 9 tetrahydrocannabinol':ti,ab OR 'delta 1 3, 4 trans tetrahydrocannabinol':ti,ab OR 'delta 1 tetrahydrocannabinol':ti,ab OR 'delta 1 trans tetrahydrocannabinol':ti,ab OR 'delta 1, 2 tetrahydrocannabinol':ti,ab OR 'delta 9 tetrahydrocannabinol':ti,ab OR 'delta 9 trans tetrahydrocannabinol':ti,ab OR 'delta1 3, 4 trans tetrahydrocannabinol':ti,ab OR 'delta1 cis tetrahydrocannabinol':ti,ab OR 'delta1 tetrahydrocannabinol':ti,ab OR 'delta1 thc':ti,ab OR 'delta1 trans tetrahydrocannabinol':ti,ab OR 'delta9 tetrahydro cannabinol':ti,ab OR 'delta9 tetrahydrocannabinol':ti,ab OR 'delta9 trans tetrahydrocannabinol':ti,ab OR 'dronabinol':ti,ab OR 'ea 1477':ti,ab OR 'ea1477':ti,ab OR 'l delta 9 trans tetrahydrocannabinol':ti,ab OR 'levo delta 1 tetrahydrocannabinol':ti,ab OR 'levo delta 9 tetrahydrocannabinol':ti,ab OR 'marinol':ti,ab OR 'qcd 84924':ti,ab OR 'syndros':ti,ab OR 'tetrahydrocannabinol 1 ene':ti,ab OR 'tetrahydrocannabinol delta1':ti,ab OR 'tetrahydrocannabinol delta9':ti,ab OR 'tetranabinex':ti,ab OR 'trans delta 9 tetrahydrocannabinol':ti,ab OR 'u1 tetrahydrocannabinol':ti,ab OR 'u9 tetrahydrocannabinol':ti,ab OR thc:ti,ab OR 'tetrahydrocannabinol'/exp OR '1 trans delta 8 tetrahydrocannabinol':ti,ab OR '7, 8, 9, 10 tetrahydrocannabinol':ti,ab OR 'delta 2 tetrahydrocannabinol':ti,ab OR 'delta 3 tetrahydrocannabinol':ti,ab OR 'delta 5 tetrahydrocannabinol':ti,ab OR 'delta 6a, 10a tetrahydrocannabinol':ti,ab OR 'delta tetrahydrocannabinol':ti,ab OR 'delta3 tetrahydrocannabinol':ti,ab OR 'delta3 thc':ti,ab OR 'sp 104':ti,ab OR 'tetrahydro cannabinol':ti,ab OR 'tetrahydrocannabinal':ti,ab OR 'tetrahydrocannabinol':ti,ab OR 'tetrahydrocannabinol isomer':ti,ab OR 'tetrahydrocannabiol':ti,ab OR 'trans tetrahydrocannabinol':ti,ab OR 'synthetic cannabinoid'/exp OR 'synthetic cannabinoid':ti,ab OR scb:ti,ab OR (('spice':ti,ab OR 'spices':ti,ab OR 'k2':ti,ab) AND ('cannabinoid'/exp OR 'cannabinoid':ti,ab OR 'cannabinoids':ti,ab OR 'cannabis'/exp OR 'cannabis sativa extract':ti,ab OR 'cannabis sativa leaf':ti,ab OR 'cannabis sativa resin':ti,ab OR 'indian bhang':ti,ab OR 'indian ganja':ti,ab OR 'bhang':ti,ab OR 'cannabis':ti,ab OR 'cannabis alkaloid':ti,ab OR 'cannabis constituent':ti,ab OR 'cannabis extract':ti,ab OR 'cannabis herba':ti,ab OR 'cannabis leaf':ti,ab OR 'cannador':ti,ab OR 'charas':ti,ab OR 'ganja':ti,ab OR 'ganjah':ti,ab OR 'hashish':ti,ab OR 'hashish oil':ti,ab OR 'hemp extract':ti,ab OR 'herba cannabis':ti,ab OR 'marihuana':ti,ab OR 'marijuana':ti,ab OR 'mexican marihuana':ti,ab OR 'medical cannabis'/exp OR 'medical cannabis':ti,ab OR 'medical marihuana':ti,ab OR 'medical marijuana':ti,ab OR 'medicinal cannabis':ti,ab OR 'medicinal marihuana':ti,ab OR 'medicinal marijuana':ti,ab OR 'marijuana treatment':ti,ab OR 'dronabinol'/exp OR '1 trans delta 9 tetrahydrocannabinol':ti,ab OR 'delta 1 3, 4 trans tetrahydrocannabinol':ti,ab OR 'delta 1 tetrahydrocannabinol':ti,ab OR 'delta 1 trans tetrahydrocannabinol':ti,ab OR 'delta 1, 2 tetrahydrocannabinol':ti,ab OR 'delta 9 tetrahydrocannabinol':ti,ab OR 'delta 9 trans tetrahydrocannabinol':ti,ab OR 'delta1 3, 4 trans tetrahydrocannabinol':ti,ab OR 'delta1 cis tetrahydrocannabinol':ti,ab OR 'delta1 tetrahydrocannabinol':ti,ab OR 'delta1 thc':ti,ab OR 'delta1 trans tetrahydrocannabinol':ti,ab OR 'delta9 tetrahydro cannabinol':ti,ab OR 'delta9 tetrahydrocannabinol':ti,ab OR 'delta9 trans tetrahydrocannabinol':ti,ab OR 'dronabinol':ti,ab OR 'ea 1477':ti,ab OR 'ea1477':ti,ab OR 'l delta 9 trans tetrahydrocannabinol':ti,ab OR 'levo delta 1 tetrahydrocannabinol':ti,ab OR 'levo delta 9 tetrahydrocannabinol':ti,ab OR 'marinol':ti,ab OR 'qcd 84924':ti,ab OR 'syndros':ti,ab OR 'tetrahydrocannabinol 1 ene':ti,ab OR 'tetrahydrocannabinol delta1':ti,ab OR 'tetrahydrocannabinol delta9':ti,ab OR 'tetranabinex':ti,ab OR 'trans delta 9 tetrahydrocannabinol':ti,ab OR 'u1 tetrahydrocannabinol':ti,ab OR 'u9 tetrahydrocannabinol':ti,ab OR thc:ti,ab OR 'tetrahydrocannabinol'/exp OR '1 trans delta 8 tetrahydrocannabinol':ti,ab OR '7, 8, 9, 10 tetrahydrocannabinol':ti,ab OR 'delta 2 tetrahydrocannabinol':ti,ab OR 'delta 3 tetrahydrocannabinol':ti,ab OR 'delta 5 tetrahydrocannabinol':ti,ab OR 'delta 6a, 10a tetrahydrocannabinol':ti,ab OR 'delta tetrahydrocannabinol':ti,ab OR 'delta3 tetrahydrocannabinol':ti,ab OR 'delta3 thc':ti,ab OR 'sp 104':ti,ab OR 'tetrahydro cannabinol':ti,ab OR 'tetrahydrocannabinal':ti,ab OR 'tetrahydrocannabinol':ti,ab OR 'tetrahydrocannabinol isomer':ti,ab OR 'tetrahydrocannabiol':ti,ab OR 'trans tetrahydrocannabinol':ti,ab OR 'synthetic cannabinoid'/exp OR 'synthetic cannabinoid':ti,ab OR scb:ti,ab))) | | 562 |  |
|  |  |  |  |
| **Multiple Sclerosis** |  |  |  |
| ('multiple sclerosis'/exp OR 'ms':ti,ab OR 'chariot disease':ti,ab OR 'disseminated sclerosis':ti,ab OR 'insular sclerosis':ti,ab OR 'multiple sclerosis':ti,ab OR 'multiple sclerosis, chronic progressive':ti,ab OR 'multiple sclerosis, relapsing-remitting':ti,ab OR 'primary progressive multiple sclerosis':ti,ab OR 'relapsing remitting multiple sclerosis':ti,ab OR 'relapsing-remitting multiple sclerosis':ti,ab OR 'sclerosis multiplex':ti,ab OR 'sclerosis, disseminated':ti,ab OR 'sclerosis, insular':ti,ab OR 'sclerosis, multiple':ti,ab OR 'secondary progressive multiple sclerosis':ti,ab) AND ('cannabinoid'/exp OR 'cannabinoid':ti,ab OR 'cannabinoids':ti,ab OR 'cannabis'/exp OR 'cannabis sativa extract':ti,ab OR 'cannabis sativa leaf':ti,ab OR 'cannabis sativa resin':ti,ab OR 'indian bhang':ti,ab OR 'indian ganja':ti,ab OR 'bhang':ti,ab OR 'cannabis':ti,ab OR 'cannabis alkaloid':ti,ab OR 'cannabis constituent':ti,ab OR 'cannabis extract':ti,ab OR 'cannabis herba':ti,ab OR 'cannabis leaf':ti,ab OR 'cannador':ti,ab OR 'charas':ti,ab OR 'ganja':ti,ab OR 'ganjah':ti,ab OR 'hashish':ti,ab OR 'hashish oil':ti,ab OR 'hemp extract':ti,ab OR 'herba cannabis':ti,ab OR 'marihuana':ti,ab OR 'marijuana':ti,ab OR 'mexican marihuana':ti,ab OR 'medical cannabis'/exp OR 'medical cannabis':ti,ab OR 'medical marihuana':ti,ab OR 'medical marijuana':ti,ab OR 'medicinal cannabis':ti,ab OR 'medicinal marihuana':ti,ab OR 'medicinal marijuana':ti,ab OR 'marijuana treatment':ti,ab OR 'dronabinol'/exp OR '1 trans delta 9 tetrahydrocannabinol':ti,ab OR 'delta 1 3, 4 trans tetrahydrocannabinol':ti,ab OR 'delta 1 tetrahydrocannabinol':ti,ab OR 'delta 1 trans tetrahydrocannabinol':ti,ab OR 'delta 1, 2 tetrahydrocannabinol':ti,ab OR 'delta 9 tetrahydrocannabinol':ti,ab OR 'delta 9 trans tetrahydrocannabinol':ti,ab OR 'delta1 3, 4 trans tetrahydrocannabinol':ti,ab OR 'delta1 cis tetrahydrocannabinol':ti,ab OR 'delta1 tetrahydrocannabinol':ti,ab OR 'delta1 thc':ti,ab OR 'delta1 trans tetrahydrocannabinol':ti,ab OR 'delta9 tetrahydro cannabinol':ti,ab OR 'delta9 tetrahydrocannabinol':ti,ab OR 'delta9 trans tetrahydrocannabinol':ti,ab OR 'dronabinol':ti,ab OR 'ea 1477':ti,ab OR 'ea1477':ti,ab OR 'l delta 9 trans tetrahydrocannabinol':ti,ab OR 'levo delta 1 tetrahydrocannabinol':ti,ab OR 'levo delta 9 tetrahydrocannabinol':ti,ab OR 'marinol':ti,ab OR 'qcd 84924':ti,ab OR 'syndros':ti,ab OR 'tetrahydrocannabinol 1 ene':ti,ab OR 'tetrahydrocannabinol delta1':ti,ab OR 'tetrahydrocannabinol delta9':ti,ab OR 'tetranabinex':ti,ab OR 'trans delta 9 tetrahydrocannabinol':ti,ab OR 'u1 tetrahydrocannabinol':ti,ab OR 'u9 tetrahydrocannabinol':ti,ab OR thc:ti,ab OR 'tetrahydrocannabinol'/exp OR '1 trans delta 8 tetrahydrocannabinol':ti,ab OR '7, 8, 9, 10 tetrahydrocannabinol':ti,ab OR 'delta 2 tetrahydrocannabinol':ti,ab OR 'delta 3 tetrahydrocannabinol':ti,ab OR 'delta 5 tetrahydrocannabinol':ti,ab OR 'delta 6a, 10a tetrahydrocannabinol':ti,ab OR 'delta tetrahydrocannabinol':ti,ab OR 'delta3 tetrahydrocannabinol':ti,ab OR 'delta3 thc':ti,ab OR 'sp 104':ti,ab OR 'tetrahydro cannabinol':ti,ab OR 'tetrahydrocannabinal':ti,ab OR 'tetrahydrocannabinol':ti,ab OR 'tetrahydrocannabinol isomer':ti,ab OR 'tetrahydrocannabiol':ti,ab OR 'trans tetrahydrocannabinol':ti,ab OR 'synthetic cannabinoid'/exp OR 'synthetic cannabinoid':ti,ab OR scb:ti,ab OR (('spice':ti,ab OR 'spices':ti,ab OR 'k2':ti,ab) AND ('cannabinoid'/exp OR 'cannabinoid':ti,ab OR 'cannabinoids':ti,ab OR 'cannabis'/exp OR 'cannabis sativa extract':ti,ab OR 'cannabis sativa leaf':ti,ab OR 'cannabis sativa resin':ti,ab OR 'indian bhang':ti,ab OR 'indian ganja':ti,ab OR 'bhang':ti,ab OR 'cannabis':ti,ab OR 'cannabis alkaloid':ti,ab OR 'cannabis constituent':ti,ab OR 'cannabis extract':ti,ab OR 'cannabis herba':ti,ab OR 'cannabis leaf':ti,ab OR 'cannador':ti,ab OR 'charas':ti,ab OR 'ganja':ti,ab OR 'ganjah':ti,ab OR 'hashish':ti,ab OR 'hashish oil':ti,ab OR 'hemp extract':ti,ab OR 'herba cannabis':ti,ab OR 'marihuana':ti,ab OR 'marijuana':ti,ab OR 'mexican marihuana':ti,ab OR 'medical cannabis'/exp OR 'medical cannabis':ti,ab OR 'medical marihuana':ti,ab OR 'medical marijuana':ti,ab OR 'medicinal cannabis':ti,ab OR 'medicinal marihuana':ti,ab OR 'medicinal marijuana':ti,ab OR 'marijuana treatment':ti,ab OR 'dronabinol'/exp OR '1 trans delta 9 tetrahydrocannabinol':ti,ab OR 'delta 1 3, 4 trans tetrahydrocannabinol':ti,ab OR 'delta 1 tetrahydrocannabinol':ti,ab OR 'delta 1 trans tetrahydrocannabinol':ti,ab OR 'delta 1, 2 tetrahydrocannabinol':ti,ab OR 'delta 9 tetrahydrocannabinol':ti,ab OR 'delta 9 trans tetrahydrocannabinol':ti,ab OR 'delta1 3, 4 trans tetrahydrocannabinol':ti,ab OR 'delta1 cis tetrahydrocannabinol':ti,ab OR 'delta1 tetrahydrocannabinol':ti,ab OR 'delta1 thc':ti,ab OR 'delta1 trans tetrahydrocannabinol':ti,ab OR 'delta9 tetrahydro cannabinol':ti,ab OR 'delta9 tetrahydrocannabinol':ti,ab OR 'delta9 trans tetrahydrocannabinol':ti,ab OR 'dronabinol':ti,ab OR 'ea 1477':ti,ab OR 'ea1477':ti,ab OR 'l delta 9 trans tetrahydrocannabinol':ti,ab OR 'levo delta 1 tetrahydrocannabinol':ti,ab OR 'levo delta 9 tetrahydrocannabinol':ti,ab OR 'marinol':ti,ab OR 'qcd 84924':ti,ab OR 'syndros':ti,ab OR 'tetrahydrocannabinol 1 ene':ti,ab OR 'tetrahydrocannabinol delta1':ti,ab OR 'tetrahydrocannabinol delta9':ti,ab OR 'tetranabinex':ti,ab OR 'trans delta 9 tetrahydrocannabinol':ti,ab OR 'u1 tetrahydrocannabinol':ti,ab OR 'u9 tetrahydrocannabinol':ti,ab OR thc:ti,ab OR 'tetrahydrocannabinol'/exp OR '1 trans delta 8 tetrahydrocannabinol':ti,ab OR '7, 8, 9, 10 tetrahydrocannabinol':ti,ab OR 'delta 2 tetrahydrocannabinol':ti,ab OR 'delta 3 tetrahydrocannabinol':ti,ab OR 'delta 5 tetrahydrocannabinol':ti,ab OR 'delta 6a, 10a tetrahydrocannabinol':ti,ab OR 'delta tetrahydrocannabinol':ti,ab OR 'delta3 tetrahydrocannabinol':ti,ab OR 'delta3 thc':ti,ab OR 'sp 104':ti,ab OR 'tetrahydro cannabinol':ti,ab OR 'tetrahydrocannabinal':ti,ab OR 'tetrahydrocannabinol':ti,ab OR 'tetrahydrocannabinol isomer':ti,ab OR 'tetrahydrocannabiol':ti,ab OR 'trans tetrahydrocannabinol':ti,ab OR 'synthetic cannabinoid'/exp OR 'synthetic cannabinoid':ti,ab OR scb:ti,ab))) | | 1230 |  |
|  |  |  |  |
| **Parkinsons Disease** |  |  |  |
| ('parkinson disease'/exp OR 'parkinson disease':ti,ab OR 'parkinson`s disease':ti,ab OR 'parkinsons disease':ti,ab OR 'paralysis agitans':ti,ab OR 'parkinson dementia complex':ti,ab OR 'parkinson disease, postencephalitic':ti,ab OR 'parkinson disease, secondary':ti,ab OR 'parkinson disease, symptomatic':ti,ab) AND ('cannabinoid'/exp OR 'cannabinoid':ti,ab OR 'cannabinoids':ti,ab OR 'cannabis'/exp OR 'cannabis sativa extract':ti,ab OR 'cannabis sativa leaf':ti,ab OR 'cannabis sativa resin':ti,ab OR 'indian bhang':ti,ab OR 'indian ganja':ti,ab OR 'bhang':ti,ab OR 'cannabis':ti,ab OR 'cannabis alkaloid':ti,ab OR 'cannabis constituent':ti,ab OR 'cannabis extract':ti,ab OR 'cannabis herba':ti,ab OR 'cannabis leaf':ti,ab OR 'cannador':ti,ab OR 'charas':ti,ab OR 'ganja':ti,ab OR 'ganjah':ti,ab OR 'hashish':ti,ab OR 'hashish oil':ti,ab OR 'hemp extract':ti,ab OR 'herba cannabis':ti,ab OR 'marihuana':ti,ab OR 'marijuana':ti,ab OR 'mexican marihuana':ti,ab OR 'medical cannabis'/exp OR 'medical cannabis':ti,ab OR 'medical marihuana':ti,ab OR 'medical marijuana':ti,ab OR 'medicinal cannabis':ti,ab OR 'medicinal marihuana':ti,ab OR 'medicinal marijuana':ti,ab OR 'marijuana treatment':ti,ab OR 'dronabinol'/exp OR '1 trans delta 9 tetrahydrocannabinol':ti,ab OR 'delta 1 3, 4 trans tetrahydrocannabinol':ti,ab OR 'delta 1 tetrahydrocannabinol':ti,ab OR 'delta 1 trans tetrahydrocannabinol':ti,ab OR 'delta 1, 2 tetrahydrocannabinol':ti,ab OR 'delta 9 tetrahydrocannabinol':ti,ab OR 'delta 9 trans tetrahydrocannabinol':ti,ab OR 'delta1 3, 4 trans tetrahydrocannabinol':ti,ab OR 'delta1 cis tetrahydrocannabinol':ti,ab OR 'delta1 tetrahydrocannabinol':ti,ab OR 'delta1 thc':ti,ab OR 'delta1 trans tetrahydrocannabinol':ti,ab OR 'delta9 tetrahydro cannabinol':ti,ab OR 'delta9 tetrahydrocannabinol':ti,ab OR 'delta9 trans tetrahydrocannabinol':ti,ab OR 'dronabinol':ti,ab OR 'ea 1477':ti,ab OR 'ea1477':ti,ab OR 'l delta 9 trans tetrahydrocannabinol':ti,ab OR 'levo delta 1 tetrahydrocannabinol':ti,ab OR 'levo delta 9 tetrahydrocannabinol':ti,ab OR 'marinol':ti,ab OR 'qcd 84924':ti,ab OR 'syndros':ti,ab OR 'tetrahydrocannabinol 1 ene':ti,ab OR 'tetrahydrocannabinol delta1':ti,ab OR 'tetrahydrocannabinol delta9':ti,ab OR 'tetranabinex':ti,ab OR 'trans delta 9 tetrahydrocannabinol':ti,ab OR 'u1 tetrahydrocannabinol':ti,ab OR 'u9 tetrahydrocannabinol':ti,ab OR thc:ti,ab OR 'tetrahydrocannabinol'/exp OR '1 trans delta 8 tetrahydrocannabinol':ti,ab OR '7, 8, 9, 10 tetrahydrocannabinol':ti,ab OR 'delta 2 tetrahydrocannabinol':ti,ab OR 'delta 3 tetrahydrocannabinol':ti,ab OR 'delta 5 tetrahydrocannabinol':ti,ab OR 'delta 6a, 10a tetrahydrocannabinol':ti,ab OR 'delta tetrahydrocannabinol':ti,ab OR 'delta3 tetrahydrocannabinol':ti,ab OR 'delta3 thc':ti,ab OR 'sp 104':ti,ab OR 'tetrahydro cannabinol':ti,ab OR 'tetrahydrocannabinal':ti,ab OR 'tetrahydrocannabinol':ti,ab OR 'tetrahydrocannabinol isomer':ti,ab OR 'tetrahydrocannabiol':ti,ab OR 'trans tetrahydrocannabinol':ti,ab OR 'synthetic cannabinoid'/exp OR 'synthetic cannabinoid':ti,ab OR scb:ti,ab OR (('spice':ti,ab OR 'spices':ti,ab OR 'k2':ti,ab) AND ('cannabinoid'/exp OR 'cannabinoid':ti,ab OR 'cannabinoids':ti,ab OR 'cannabis'/exp OR 'cannabis sativa extract':ti,ab OR 'cannabis sativa leaf':ti,ab OR 'cannabis sativa resin':ti,ab OR 'indian bhang':ti,ab OR 'indian ganja':ti,ab OR 'bhang':ti,ab OR 'cannabis':ti,ab OR 'cannabis alkaloid':ti,ab OR 'cannabis constituent':ti,ab OR 'cannabis extract':ti,ab OR 'cannabis herba':ti,ab OR 'cannabis leaf':ti,ab OR 'cannador':ti,ab OR 'charas':ti,ab OR 'ganja':ti,ab OR 'ganjah':ti,ab OR 'hashish':ti,ab OR 'hashish oil':ti,ab OR 'hemp extract':ti,ab OR 'herba cannabis':ti,ab OR 'marihuana':ti,ab OR 'marijuana':ti,ab OR 'mexican marihuana':ti,ab OR 'medical cannabis'/exp OR 'medical cannabis':ti,ab OR 'medical marihuana':ti,ab OR 'medical marijuana':ti,ab OR 'medicinal cannabis':ti,ab OR 'medicinal marihuana':ti,ab OR 'medicinal marijuana':ti,ab OR 'marijuana treatment':ti,ab OR 'dronabinol'/exp OR '1 trans delta 9 tetrahydrocannabinol':ti,ab OR 'delta 1 3, 4 trans tetrahydrocannabinol':ti,ab OR 'delta 1 tetrahydrocannabinol':ti,ab OR 'delta 1 trans tetrahydrocannabinol':ti,ab OR 'delta 1, 2 tetrahydrocannabinol':ti,ab OR 'delta 9 tetrahydrocannabinol':ti,ab OR 'delta 9 trans tetrahydrocannabinol':ti,ab OR 'delta1 3, 4 trans tetrahydrocannabinol':ti,ab OR 'delta1 cis tetrahydrocannabinol':ti,ab OR 'delta1 tetrahydrocannabinol':ti,ab OR 'delta1 thc':ti,ab OR 'delta1 trans tetrahydrocannabinol':ti,ab OR 'delta9 tetrahydro cannabinol':ti,ab OR 'delta9 tetrahydrocannabinol':ti,ab OR 'delta9 trans tetrahydrocannabinol':ti,ab OR 'dronabinol':ti,ab OR 'ea 1477':ti,ab OR 'ea1477':ti,ab OR 'l delta 9 trans tetrahydrocannabinol':ti,ab OR 'levo delta 1 tetrahydrocannabinol':ti,ab OR 'levo delta 9 tetrahydrocannabinol':ti,ab OR 'marinol':ti,ab OR 'qcd 84924':ti,ab OR 'syndros':ti,ab OR 'tetrahydrocannabinol 1 ene':ti,ab OR 'tetrahydrocannabinol delta1':ti,ab OR 'tetrahydrocannabinol delta9':ti,ab OR 'tetranabinex':ti,ab OR 'trans delta 9 tetrahydrocannabinol':ti,ab OR 'u1 tetrahydrocannabinol':ti,ab OR 'u9 tetrahydrocannabinol':ti,ab OR thc:ti,ab OR 'tetrahydrocannabinol'/exp OR '1 trans delta 8 tetrahydrocannabinol':ti,ab OR '7, 8, 9, 10 tetrahydrocannabinol':ti,ab OR 'delta 2 tetrahydrocannabinol':ti,ab OR 'delta 3 tetrahydrocannabinol':ti,ab OR 'delta 5 tetrahydrocannabinol':ti,ab OR 'delta 6a, 10a tetrahydrocannabinol':ti,ab OR 'delta tetrahydrocannabinol':ti,ab OR 'delta3 tetrahydrocannabinol':ti,ab OR 'delta3 thc':ti,ab OR 'sp 104':ti,ab OR 'tetrahydro cannabinol':ti,ab OR 'tetrahydrocannabinal':ti,ab OR 'tetrahydrocannabinol':ti,ab OR 'tetrahydrocannabinol isomer':ti,ab OR 'tetrahydrocannabiol':ti,ab OR 'trans tetrahydrocannabinol':ti,ab OR 'synthetic cannabinoid'/exp OR 'synthetic cannabinoid':ti,ab OR scb:ti,ab))) | | 275 |  |
|  |  |  |  |
| **PTSD** |  |  |  |
| ('posttraumatic stress disorder'/exp OR 'ptsd':ti,ab OR 'ptsd (posttraumatic stress disorder)':ti,ab OR 'combat disorders':ti,ab OR 'combat fatigue':ti,ab OR 'combat stress':ti,ab OR 'post-traumatic stress':ti,ab OR 'post-traumatic stress disorder':ti,ab OR 'posttraumatic neurosis':ti,ab OR 'posttraumatic psychic syndrome':ti,ab OR 'posttraumatic psychosis':ti,ab OR 'posttraumatic stress':ti,ab OR 'posttraumatic stress disorder':ti,ab OR 'posttraumatic syndrome':ti,ab OR 'psychosis, posttraumatic':ti,ab OR 'stress disorders, post-traumatic':ti,ab OR 'stress disorders, traumatic':ti,ab OR 'stress, posttraumatic':ti,ab OR 'trauma and stressor related disorders':ti,ab OR 'traumatic stress':ti,ab OR 'traumatic stress disorder':ti,ab OR 'war neurosis':ti,ab) AND ('cannabinoid'/exp OR 'cannabinoid':ti,ab OR 'cannabinoids':ti,ab OR 'cannabis'/exp OR 'cannabis sativa extract':ti,ab OR 'cannabis sativa leaf':ti,ab OR 'cannabis sativa resin':ti,ab OR 'indian bhang':ti,ab OR 'indian ganja':ti,ab OR 'bhang':ti,ab OR 'cannabis':ti,ab OR 'cannabis alkaloid':ti,ab OR 'cannabis constituent':ti,ab OR 'cannabis extract':ti,ab OR 'cannabis herba':ti,ab OR 'cannabis leaf':ti,ab OR 'cannador':ti,ab OR 'charas':ti,ab OR 'ganja':ti,ab OR 'ganjah':ti,ab OR 'hashish':ti,ab OR 'hashish oil':ti,ab OR 'hemp extract':ti,ab OR 'herba cannabis':ti,ab OR 'marihuana':ti,ab OR 'marijuana':ti,ab OR 'mexican marihuana':ti,ab OR 'medical cannabis'/exp OR 'medical cannabis':ti,ab OR 'medical marihuana':ti,ab OR 'medical marijuana':ti,ab OR 'medicinal cannabis':ti,ab OR 'medicinal marihuana':ti,ab OR 'medicinal marijuana':ti,ab OR 'marijuana treatment':ti,ab OR 'dronabinol'/exp OR '1 trans delta 9 tetrahydrocannabinol':ti,ab OR 'delta 1 3, 4 trans tetrahydrocannabinol':ti,ab OR 'delta 1 tetrahydrocannabinol':ti,ab OR 'delta 1 trans tetrahydrocannabinol':ti,ab OR 'delta 1, 2 tetrahydrocannabinol':ti,ab OR 'delta 9 tetrahydrocannabinol':ti,ab OR 'delta 9 trans tetrahydrocannabinol':ti,ab OR 'delta1 3, 4 trans tetrahydrocannabinol':ti,ab OR 'delta1 cis tetrahydrocannabinol':ti,ab OR 'delta1 tetrahydrocannabinol':ti,ab OR 'delta1 thc':ti,ab OR 'delta1 trans tetrahydrocannabinol':ti,ab OR 'delta9 tetrahydro cannabinol':ti,ab OR 'delta9 tetrahydrocannabinol':ti,ab OR 'delta9 trans tetrahydrocannabinol':ti,ab OR 'dronabinol':ti,ab OR 'ea 1477':ti,ab OR 'ea1477':ti,ab OR 'l delta 9 trans tetrahydrocannabinol':ti,ab OR 'levo delta 1 tetrahydrocannabinol':ti,ab OR 'levo delta 9 tetrahydrocannabinol':ti,ab OR 'marinol':ti,ab OR 'qcd 84924':ti,ab OR 'syndros':ti,ab OR 'tetrahydrocannabinol 1 ene':ti,ab OR 'tetrahydrocannabinol delta1':ti,ab OR 'tetrahydrocannabinol delta9':ti,ab OR 'tetranabinex':ti,ab OR 'trans delta 9 tetrahydrocannabinol':ti,ab OR 'u1 tetrahydrocannabinol':ti,ab OR 'u9 tetrahydrocannabinol':ti,ab OR thc:ti,ab OR 'tetrahydrocannabinol'/exp OR '1 trans delta 8 tetrahydrocannabinol':ti,ab OR '7, 8, 9, 10 tetrahydrocannabinol':ti,ab OR 'delta 2 tetrahydrocannabinol':ti,ab OR 'delta 3 tetrahydrocannabinol':ti,ab OR 'delta 5 tetrahydrocannabinol':ti,ab OR 'delta 6a, 10a tetrahydrocannabinol':ti,ab OR 'delta tetrahydrocannabinol':ti,ab OR 'delta3 tetrahydrocannabinol':ti,ab OR 'delta3 thc':ti,ab OR 'sp 104':ti,ab OR 'tetrahydro cannabinol':ti,ab OR 'tetrahydrocannabinal':ti,ab OR 'tetrahydrocannabinol':ti,ab OR 'tetrahydrocannabinol isomer':ti,ab OR 'tetrahydrocannabiol':ti,ab OR 'trans tetrahydrocannabinol':ti,ab OR 'synthetic cannabinoid'/exp OR 'synthetic cannabinoid':ti,ab OR scb:ti,ab OR (('spice':ti,ab OR 'spices':ti,ab OR 'k2':ti,ab) AND ('cannabinoid'/exp OR 'cannabinoid':ti,ab OR 'cannabinoids':ti,ab OR 'cannabis'/exp OR 'cannabis sativa extract':ti,ab OR 'cannabis sativa leaf':ti,ab OR 'cannabis sativa resin':ti,ab OR 'indian bhang':ti,ab OR 'indian ganja':ti,ab OR 'bhang':ti,ab OR 'cannabis':ti,ab OR 'cannabis alkaloid':ti,ab OR 'cannabis constituent':ti,ab OR 'cannabis extract':ti,ab OR 'cannabis herba':ti,ab OR 'cannabis leaf':ti,ab OR 'cannador':ti,ab OR 'charas':ti,ab OR 'ganja':ti,ab OR 'ganjah':ti,ab OR 'hashish':ti,ab OR 'hashish oil':ti,ab OR 'hemp extract':ti,ab OR 'herba cannabis':ti,ab OR 'marihuana':ti,ab OR 'marijuana':ti,ab OR 'mexican marihuana':ti,ab OR 'medical cannabis'/exp OR 'medical cannabis':ti,ab OR 'medical marihuana':ti,ab OR 'medical marijuana':ti,ab OR 'medicinal cannabis':ti,ab OR 'medicinal marihuana':ti,ab OR 'medicinal marijuana':ti,ab OR 'marijuana treatment':ti,ab OR 'dronabinol'/exp OR '1 trans delta 9 tetrahydrocannabinol':ti,ab OR 'delta 1 3, 4 trans tetrahydrocannabinol':ti,ab OR 'delta 1 tetrahydrocannabinol':ti,ab OR 'delta 1 trans tetrahydrocannabinol':ti,ab OR 'delta 1, 2 tetrahydrocannabinol':ti,ab OR 'delta 9 tetrahydrocannabinol':ti,ab OR 'delta 9 trans tetrahydrocannabinol':ti,ab OR 'delta1 3, 4 trans tetrahydrocannabinol':ti,ab OR 'delta1 cis tetrahydrocannabinol':ti,ab OR 'delta1 tetrahydrocannabinol':ti,ab OR 'delta1 thc':ti,ab OR 'delta1 trans tetrahydrocannabinol':ti,ab OR 'delta9 tetrahydro cannabinol':ti,ab OR 'delta9 tetrahydrocannabinol':ti,ab OR 'delta9 trans tetrahydrocannabinol':ti,ab OR 'dronabinol':ti,ab OR 'ea 1477':ti,ab OR 'ea1477':ti,ab OR 'l delta 9 trans tetrahydrocannabinol':ti,ab OR 'levo delta 1 tetrahydrocannabinol':ti,ab OR 'levo delta 9 tetrahydrocannabinol':ti,ab OR 'marinol':ti,ab OR 'qcd 84924':ti,ab OR 'syndros':ti,ab OR 'tetrahydrocannabinol 1 ene':ti,ab OR 'tetrahydrocannabinol delta1':ti,ab OR 'tetrahydrocannabinol delta9':ti,ab OR 'tetranabinex':ti,ab OR 'trans delta 9 tetrahydrocannabinol':ti,ab OR 'u1 tetrahydrocannabinol':ti,ab OR 'u9 tetrahydrocannabinol':ti,ab OR thc:ti,ab OR 'tetrahydrocannabinol'/exp OR '1 trans delta 8 tetrahydrocannabinol':ti,ab OR '7, 8, 9, 10 tetrahydrocannabinol':ti,ab OR 'delta 2 tetrahydrocannabinol':ti,ab OR 'delta 3 tetrahydrocannabinol':ti,ab OR 'delta 5 tetrahydrocannabinol':ti,ab OR 'delta 6a, 10a tetrahydrocannabinol':ti,ab OR 'delta tetrahydrocannabinol':ti,ab OR 'delta3 tetrahydrocannabinol':ti,ab OR 'delta3 thc':ti,ab OR 'sp 104':ti,ab OR 'tetrahydro cannabinol':ti,ab OR 'tetrahydrocannabinal':ti,ab OR 'tetrahydrocannabinol':ti,ab OR 'tetrahydrocannabinol isomer':ti,ab OR 'tetrahydrocannabiol':ti,ab OR 'trans tetrahydrocannabinol':ti,ab OR 'synthetic cannabinoid'/exp OR 'synthetic cannabinoid':ti,ab OR scb:ti,ab))) | | | 442 |

**Web of Science Search Queries**

| **CONDITION** |  | **RESULTS** |
| --- | --- | --- |
| **ALS** |  |  |
| ("Amyotrophic Lateral Sclerosis" OR "Lou Gehrig Disease" OR "Gehrig Disease" OR "Guam Disease" OR "Charcot Disease" OR ALS) AND (Cannabinoids OR Cannabinoid OR "Cannabis" OR Marijuana OR Marihuana OR "Dronabinol" OR Tetrahydrocannabinol OR THC OR "Cannabidiol" OR Marinol OR "synthetic cannabinoids" OR "synthetic cannabinoid" OR SCB OR "Medical Marijuana" OR "Medicinal Cannabis" OR "Marijuana Treatment" OR "Medical Cannabis" OR "Cannabinol") OR ((spice OR spices OR K2) AND (Cannabinoids OR Cannabinoid OR "Cannabis" OR Marijuana OR Marihuana OR "Dronabinol" OR Tetrahydrocannabinol OR THC OR "Cannabidiol" OR Marinol OR "synthetic cannabinoids" OR "synthetic cannabinoid" OR SCB OR "Medical Marijuana" OR "Medicinal Cannabis" OR "Marijuana Treatment" OR "Medical Cannabis" OR "Cannabinol")) | | 293 |
|  |  |  |
| **Autism** |  |  |
| ("Autistic Disorder" OR "Kanner Syndrome" OR "Infantile Autism" OR autism OR "Autism Spectrum Disorder" OR autistic) AND (Cannabinoids OR Cannabinoid OR "Cannabis" OR Marijuana OR Marihuana OR Dronabinol OR Tetrahydrocannabinol OR THC OR Cannabidiol OR Marinol OR "synthetic cannabinoids" OR "synthetic cannabinoid" OR SCB OR "Medical Marijuana" OR "Medicinal Cannabis" OR "Marijuana Treatment" OR "Medical Cannabis" OR Cannabinol) OR ((spice OR spices OR K2) AND ( Cannabinoids OR Cannabinoid OR Cannabis OR Marijuana OR Marihuana OR Dronabinol OR Tetrahydrocannabinol OR THC OR Cannabidiol OR Marinol OR "synthetic cannabinoids" OR "synthetic cannabinoid" OR SCB OR "Medical Marijuana" OR "Medicinal Cannabis" OR "Marijuana Treatment" OR "Medical Cannabis" OR Cannabinol)) | | 322 |
|  |  |  |
| **Cancer** |  |  |
| (cancer OR neoplasms OR neoplasm OR Cancer* OR Malignan* OR tumor OR tumors OR tumour) AND (Cannabinoids OR Cannabinoid OR "Cannabis" OR Marijuana OR Marihuana OR Dronabinol OR Tetrahydrocannabinol OR THC OR Cannabidiol OR Marinol OR "synthetic cannabinoids" OR "synthetic cannabinoid" OR SCB OR "Medical Marijuana" OR "Medicinal Cannabis" OR "Marijuana Treatment" OR "Medical Cannabis" OR Cannabinol) OR ((spice OR spices OR K2) AND ( Cannabinoids OR Cannabinoid OR Cannabis OR Marijuana OR Marihuana OR Dronabinol OR Tetrahydrocannabinol OR THC OR Cannabidiol OR Marinol OR "synthetic cannabinoids" OR "synthetic cannabinoid" OR SCB OR "Medical Marijuana" OR "Medicinal Cannabis" OR "Marijuana Treatment" OR "Medical Cannabis" OR Cannabinol)) | | 1165 |
|  |  |  |
| **Chronic Non-Malignant Pain** |  |  |
| ("chronic nonmalignant pain" OR "chronic pain" OR "Chronic Pains") AND (Cannabinoids OR Cannabinoid OR "Cannabis" OR Marijuana OR Marihuana OR Dronabinol OR Tetrahydrocannabinol OR THC OR Cannabidiol OR Marinol OR "synthetic cannabinoids" OR "synthetic cannabinoid" OR SCB OR "Medical Marijuana" OR "Medicinal Cannabis" OR "Marijuana Treatment" OR "Medical Cannabis" OR Cannabinol) OR ((spice OR spices OR K2) AND ( Cannabinoids OR Cannabinoid OR Cannabis OR Marijuana OR Marihuana OR Dronabinol OR Tetrahydrocannabinol OR THC OR Cannabidiol OR Marinol OR "synthetic cannabinoids" OR "synthetic cannabinoid" OR SCB OR "Medical Marijuana" OR "Medicinal Cannabis" OR "Marijuana Treatment" OR "Medical Cannabis" OR Cannabinol)) | | 609 |
|  |  |  |
| **Crohns Disease** |  |  |
| ("Crohn Disease" OR crohn OR crohns OR "Crohn's Enteritis" OR "Regional Enteritis" OR "Granulomatous Enteritis" OR Ileocolitis OR "Granulomatous Colitis" OR "Terminal Ileitis" OR "Regional Ileitis") AND (Cannabinoids OR Cannabinoid OR "Cannabis" OR Marijuana OR Marihuana OR Dronabinol OR Tetrahydrocannabinol OR THC OR Cannabidiol OR Marinol OR "synthetic cannabinoids" OR "synthetic cannabinoid" OR SCB OR "Medical Marijuana" OR "Medicinal Cannabis" OR "Marijuana Treatment" OR "Medical Cannabis" OR Cannabinol) OR ((spice OR spices OR K2) AND ( Cannabinoids OR Cannabinoid OR Cannabis OR Marijuana OR Marihuana OR Dronabinol OR Tetrahydrocannabinol OR THC OR Cannabidiol OR Marinol OR "synthetic cannabinoids" OR "synthetic cannabinoid" OR SCB OR "Medical Marijuana" OR "Medicinal Cannabis" OR "Marijuana Treatment" OR "Medical Cannabis" OR Cannabinol)) | | 297 |
|  |  |  |
| **Epilepsy** |  |  |
| (Epilep* OR "Seizure Disorder" OR "Seizure Disorders" OR Aura*) AND (Cannabinoids OR Cannabinoid OR "Cannabis" OR Marijuana OR Marihuana OR Dronabinol OR Tetrahydrocannabinol OR THC OR Cannabidiol OR Marinol OR "synthetic cannabinoids" OR "synthetic cannabinoid" OR SCB OR "Medical Marijuana" OR "Medicinal Cannabis" OR "Marijuana Treatment" OR "Medical Cannabis" OR Cannabinol) OR ((spice OR spices OR K2) AND ( Cannabinoids OR Cannabinoid OR Cannabis OR Marijuana OR Marihuana OR Dronabinol OR Tetrahydrocannabinol OR THC OR Cannabidiol OR Marinol OR "synthetic cannabinoids" OR "synthetic cannabinoid" OR SCB OR "Medical Marijuana" OR "Medicinal Cannabis" OR "Marijuana Treatment" OR "Medical Cannabis" OR Cannabinol)) | | 739 |
|  |  |  |
| **Glaucoma** |  |  |
| (Glaucoma* OR "Ocular Hypertension" OR "Ocular Hypertensions" OR "Suspect Glaucoma" OR "Suspect Glaucomas") AND (Cannabinoids OR Cannabinoid OR "Cannabis" OR Marijuana OR Marihuana OR Dronabinol OR Tetrahydrocannabinol OR THC OR Cannabidiol OR Marinol OR "synthetic cannabinoids" OR "synthetic cannabinoid" OR SCB OR "Medical Marijuana" OR "Medicinal Cannabis" OR "Marijuana Treatment" OR "Medical Cannabis" OR Cannabinol) OR ((spice OR spices OR K2) AND ( Cannabinoids OR Cannabinoid OR Cannabis OR Marijuana OR Marihuana OR Dronabinol OR Tetrahydrocannabinol OR THC OR Cannabidiol OR Marinol OR "synthetic cannabinoids" OR "synthetic cannabinoid" OR SCB OR "Medical Marijuana" OR "Medicinal Cannabis" OR "Marijuana Treatment" OR "Medical Cannabis" OR Cannabinol)) | | 299 |
|  |  |  |
| **HIV/AIDS** |  |  |
| (HIV OR "Human Immunodeficiency Virus" OR "Human Immunodeficiency Viruses" OR "Human T Cell Lymphotropic Virus Type III" OR "Human T Cell Leukemia Virus Type III" OR LAV-HTLV-III OR "Lymphadenopathy Associated Virus" OR "Human T Lymphotropic Virus Type III" OR "AIDS Virus" OR AIDS OR "AIDS Viruses" OR "Acquired Immune Deficiency Syndrome Virus" OR "Acquired Immunodeficiency Syndrome Virus" OR HTLV-III OR “Acquired Immune Deficiency Syndrome” OR “Acquired Immune Deficiency Syndromes” OR “Acquired Immunodeficiency Syndromes”) AND (Cannabinoids OR Cannabinoid OR "Cannabis" OR Marijuana OR Marihuana OR Dronabinol OR Tetrahydrocannabinol OR THC OR Cannabidiol OR Marinol OR "synthetic cannabinoids" OR "synthetic cannabinoid" OR SCB OR "Medical Marijuana" OR "Medicinal Cannabis" OR "Marijuana Treatment" OR "Medical Cannabis" OR Cannabinol) OR ((spice OR spices OR K2) AND ( Cannabinoids OR Cannabinoid OR Cannabis OR Marijuana OR Marihuana OR Dronabinol OR Tetrahydrocannabinol OR THC OR Cannabidiol OR Marinol OR "synthetic cannabinoids" OR "synthetic cannabinoid" OR SCB OR "Medical Marijuana" OR "Medicinal Cannabis" OR "Marijuana Treatment" OR "Medical Cannabis" OR Cannabinol)) | | 796 |
|  |  |  |
| **Multiple Sclerosis** |  |  |
| ("Multiple Sclerosis" OR "Disseminated Sclerosis") AND (Cannabinoids OR Cannabinoid OR "Cannabis" OR Marijuana OR Marihuana OR Dronabinol OR Tetrahydrocannabinol OR THC OR Cannabidiol OR Marinol OR "synthetic cannabinoids" OR "synthetic cannabinoid" OR SCB OR "Medical Marijuana" OR "Medicinal Cannabis" OR "Marijuana Treatment" OR "Medical Cannabis" OR Cannabinol) OR ((spice OR spices OR K2) AND ( Cannabinoids OR Cannabinoid OR Cannabis OR Marijuana OR Marihuana OR Dronabinol OR Tetrahydrocannabinol OR THC OR Cannabidiol OR Marinol OR "synthetic cannabinoids" OR "synthetic cannabinoid" OR SCB OR "Medical Marijuana" OR "Medicinal Cannabis" OR "Marijuana Treatment" OR "Medical Cannabis" OR Cannabinol)) | | 620 |
|  |  |  |
| **Parkinsons Disease** |  |  |
| ("Parkinson Disease" OR "Lewy Body Parkinson Disease" OR "Primary Parkinsonism" OR "Idiopathic Parkinson Disease") AND (Cannabinoids OR Cannabinoid OR "Cannabis" OR Marijuana OR Marihuana OR Dronabinol OR Tetrahydrocannabinol OR THC OR Cannabidiol OR Marinol OR "synthetic cannabinoids" OR "synthetic cannabinoid" OR SCB OR "Medical Marijuana" OR "Medicinal Cannabis" OR "Marijuana Treatment" OR "Medical Cannabis" OR Cannabinol) OR ((spice OR spices OR K2) AND ( Cannabinoids OR Cannabinoid OR Cannabis OR Marijuana OR Marihuana OR Dronabinol OR Tetrahydrocannabinol OR THC OR Cannabidiol OR Marinol OR "synthetic cannabinoids" OR "synthetic cannabinoid" OR SCB OR "Medical Marijuana" OR "Medicinal Cannabis" OR "Marijuana Treatment" OR "Medical Cannabis" OR Cannabinol)) | | 261 |
|  |  |  |
| **PTSD** |  |  |
| (PTSD OR "Posttraumatic Neuroses" OR "Posttraumatic Stress Disorders" OR "Posttraumatic Stress Disorder" OR "Post-Traumatic Neuroses" OR "Post Traumatic Stress Disorders" OR "Post Traumatic Stress Disorder" OR "Acute Post Traumatic Stress Disorder" OR "Chronic Post-Traumatic Stress Disorder") AND (Cannabinoids OR Cannabinoid OR "Cannabis" OR Marijuana OR Marihuana OR Dronabinol OR Tetrahydrocannabinol OR THC OR Cannabidiol OR Marinol OR "synthetic cannabinoids" OR "synthetic cannabinoid" OR SCB OR "Medical Marijuana" OR "Medicinal Cannabis" OR "Marijuana Treatment" OR "Medical Cannabis" OR Cannabinol) OR ((spice OR spices OR K2) AND ( Cannabinoids OR Cannabinoid OR Cannabis OR Marijuana OR Marihuana OR Dronabinol OR Tetrahydrocannabinol OR THC OR Cannabidiol OR Marinol OR "synthetic cannabinoids" OR "synthetic cannabinoid" OR SCB OR "Medical Marijuana" OR "Medicinal Cannabis" OR "Marijuana Treatment" OR "Medical Cannabis" OR Cannabinol)) | | 522 |

**Cochrane Searches for Marijuana and Disease Listed**

ALS

| Search Number | Search Query | Results |
| --- | --- | --- |
| 1 | ("Amyotrophic Lateral Sclerosis" OR "Lou Gehrig Disease" OR "Gehrig Disease" OR "Guam Disease" OR "Charcot Disease" OR ALS):ti,ab,kw | 1969 |
| 2 | (Cannabinoids OR Cannabinoid OR Cannabis OR Marijuana OR Marihuana OR Dronabinol OR Tetrahydrocannabinol OR THC OR Cannabidiol OR Marinol OR "synthetic cannabinoids" OR "synthetic cannabinoid" OR SCB OR "Medical Marijuana" OR "Medicinal Cannabis" OR "Marijuana Treatment" OR "Medical Cannabis" OR Cannabinol):ti,ab,kw | 4154 |
| 3 | (spice OR spices OR k2):ti,ab,kw | 632 |
| 4 | (Cannabinoids OR Cannabinoid OR Cannabis OR Marijuana OR Marihuana OR Dronabinol OR Tetrahydrocannabinol OR THC OR Cannabidiol OR Marinol OR "synthetic cannabinoids" OR "synthetic cannabinoid" OR SCB OR "Medical Marijuana" OR "Medicinal Cannabis" OR "Marijuana Treatment" OR "Medical Cannabis" OR Cannabinol):ti,ab,kw | 4154 |
| 5 | #3 AND #4 | 7 |
| 6 | #2 OR #5 | 4154 |
| 7 | #1 AND #6 |  |
| 8 | Filters: Published between May 2016-September 2019 | 4 |

Autism

| Search Number | Search Query | Results |
| --- | --- | --- |
| 1 | ("Autistic Disorder" OR "Kanner Syndrome" OR "Infantile Autism" OR autism OR "Autism Spectrum Disorder" OR autistic):ti,ab,kw | 3182 |
| 2 | (Cannabinoids OR Cannabinoid OR Cannabis OR Marijuana OR Marihuana OR Dronabinol OR Tetrahydrocannabinol OR THC OR Cannabidiol OR Marinol OR "synthetic cannabinoids" OR "synthetic cannabinoid" OR SCB OR "Medical Marijuana" OR "Medicinal Cannabis" OR "Marijuana Treatment" OR "Medical Cannabis" OR Cannabinol):ti,ab,kw | 4154 |
| 3 | (spice OR spices OR k2):ti,ab,kw | 632 |
| 4 | (Cannabinoids OR Cannabinoid OR Cannabis OR Marijuana OR Marihuana OR Dronabinol OR Tetrahydrocannabinol OR THC OR Cannabidiol OR Marinol OR "synthetic cannabinoids" OR "synthetic cannabinoid" OR SCB OR "Medical Marijuana" OR "Medicinal Cannabis" OR "Marijuana Treatment" OR "Medical Cannabis" OR Cannabinol):ti,ab,kw | 4154 |
| 5 | #3 AND #4 | 4 |
| 6 | #2 OR #5 | 4154 |
| 7 | #1 AND #6 |  |
| 8 | Filters: Published between May 2016-September 2019 | 4 |

Cancer

| Search Number | Search Query | Results |
| --- | --- | --- |
| 1 | (cancer OR neoplasms OR neoplasm OR Cancer* OR Malignan* OR tumor OR tumors OR tumour):ti,ab,kw | 197038 |
| 2 | (Cannabinoids OR Cannabinoid OR Cannabis OR Marijuana OR Marihuana OR Dronabinol OR Tetrahydrocannabinol OR THC OR Cannabidiol OR Marinol OR "synthetic cannabinoids" OR "synthetic cannabinoid" OR SCB OR "Medical Marijuana" OR "Medicinal Cannabis" OR "Marijuana Treatment" OR "Medical Cannabis" OR Cannabinol):ti,ab,kw | 4154 |
| 3 | (spice OR spices OR k2):ti,ab,kw | 632 |
| 4 | (Cannabinoids OR Cannabinoid OR Cannabis OR Marijuana OR Marihuana OR Dronabinol OR Tetrahydrocannabinol OR THC OR Cannabidiol OR Marinol OR "synthetic cannabinoids" OR "synthetic cannabinoid" OR SCB OR "Medical Marijuana" OR "Medicinal Cannabis" OR "Marijuana Treatment" OR "Medical Cannabis" OR Cannabinol):ti,ab,kw | 4154 |
| 5 | #3 AND #4 | 7 |
| 6 | #2 OR #5 | 4154 |
| 7 | #1 AND #6 |  |
| 8 | Filters: Published between May 2016-September 2019 | 75 |

Chronic Pain

| Search Number | Search Query | Results |
| --- | --- | --- |
| 1 | ("chronic nonmalignant pain" OR "chronic pain" OR "Chronic Pains"):ti,ab,kw | 8084 |
| 2 | (Cannabinoids OR Cannabinoid OR Cannabis OR Marijuana OR Marihuana OR Dronabinol OR Tetrahydrocannabinol OR THC OR Cannabidiol OR Marinol OR "synthetic cannabinoids" OR "synthetic cannabinoid" OR SCB OR "Medical Marijuana" OR "Medicinal Cannabis" OR "Marijuana Treatment" OR "Medical Cannabis" OR Cannabinol):ti,ab,kw | 4154 |
| 3 | (spice OR spices OR k2):ti,ab,kw | 632 |
| 4 | (Cannabinoids OR Cannabinoid OR Cannabis OR Marijuana OR Marihuana OR Dronabinol OR Tetrahydrocannabinol OR THC OR Cannabidiol OR Marinol OR "synthetic cannabinoids" OR "synthetic cannabinoid" OR SCB OR "Medical Marijuana" OR "Medicinal Cannabis" OR "Marijuana Treatment" OR "Medical Cannabis" OR Cannabinol):ti,ab,kw | 4154 |
| 5 | #3 AND #4 | 7 |
| 6 | #2 OR #5 | 4154 |
| 7 | #1 AND #6 |  |
| 8 | Filters: Published between May 2016-September 2019 | 38 |

Crohns

| Search Number | Search Query | Results |
| --- | --- | --- |
| 1 | ("Crohn Disease" OR crohn OR crohns OR "Crohn's Enteritis" OR "Regional Enteritis" OR "Granulomatous Enteritis" OR Ileocolitis OR "Granulomatous Colitis" OR "Terminal Ileitis" OR "Regional Ileitis"):ti,ab,kw | 4746 |
| 2 | (Cannabinoids OR Cannabinoid OR Cannabis OR Marijuana OR Marihuana OR Dronabinol OR Tetrahydrocannabinol OR THC OR Cannabidiol OR Marinol OR "synthetic cannabinoids" OR "synthetic cannabinoid" OR SCB OR "Medical Marijuana" OR "Medicinal Cannabis" OR "Marijuana Treatment" OR "Medical Cannabis" OR Cannabinol):ti,ab,kw | 4154 |
| 3 | (spice OR spices OR k2):ti,ab,kw | 632 |
| 4 | (Cannabinoids OR Cannabinoid OR Cannabis OR Marijuana OR Marihuana OR Dronabinol OR Tetrahydrocannabinol OR THC OR Cannabidiol OR Marinol OR "synthetic cannabinoids" OR "synthetic cannabinoid" OR SCB OR "Medical Marijuana" OR "Medicinal Cannabis" OR "Marijuana Treatment" OR "Medical Cannabis" OR Cannabinol):ti,ab,kw | 4154 |
| 5 | #3 AND #4 | 7 |
| 6 | #2 OR #5 | 4154 |
| 7 | #1 AND #6 |  |
| 8 | Filters: Published between May 2016-September 2019 | 9 |

Epilepsy

| Search Number | Search Query | Results |
| --- | --- | --- |
| 1 | (Epilep* OR "Seizure Disorder" OR "Seizure Disorders" OR Aura*):ti,ab,kw | 9878 |
| 2 | (Cannabinoids OR Cannabinoid OR Cannabis OR Marijuana OR Marihuana OR Dronabinol OR Tetrahydrocannabinol OR THC OR Cannabidiol OR Marinol OR "synthetic cannabinoids" OR "synthetic cannabinoid" OR SCB OR "Medical Marijuana" OR "Medicinal Cannabis" OR "Marijuana Treatment" OR "Medical Cannabis" OR Cannabinol):ti,ab,kw | 4154 |
| 3 | (spice OR spices OR k2):ti,ab,kw | 632 |
| 4 | (Cannabinoids OR Cannabinoid OR Cannabis OR Marijuana OR Marihuana OR Dronabinol OR Tetrahydrocannabinol OR THC OR Cannabidiol OR Marinol OR "synthetic cannabinoids" OR "synthetic cannabinoid" OR SCB OR "Medical Marijuana" OR "Medicinal Cannabis" OR "Marijuana Treatment" OR "Medical Cannabis" OR Cannabinol):ti,ab,kw | 4154 |
| 5 | #3 AND #4 | 7 |
| 6 | #2 OR #5 | 4154 |
| 7 | #1 AND #6 | 101 |
| 8 | Filters: 2016-2019 | 72 |

Glaucoma

| Search Number | Search Query | Results |
| --- | --- | --- |
| 1 | (Glaucoma* OR "Ocular Hypertension" OR "Ocular Hypertensions" OR "Suspect Glaucoma" OR "Suspect Glaucomas"):ti,ab,kw | 8031 |
| 2 | (Cannabinoids OR Cannabinoid OR Cannabis OR Marijuana OR Marihuana OR Dronabinol OR Tetrahydrocannabinol OR THC OR Cannabidiol OR Marinol OR "synthetic cannabinoids" OR "synthetic cannabinoid" OR SCB OR "Medical Marijuana" OR "Medicinal Cannabis" OR "Marijuana Treatment" OR "Medical Cannabis" OR Cannabinol):ti,ab,kw | 4154 |
| 3 | (spice OR spices OR k2):ti,ab,kw | 632 |
| 4 | (Cannabinoids OR Cannabinoid OR Cannabis OR Marijuana OR Marihuana OR Dronabinol OR Tetrahydrocannabinol OR THC OR Cannabidiol OR Marinol OR "synthetic cannabinoids" OR "synthetic cannabinoid" OR SCB OR "Medical Marijuana" OR "Medicinal Cannabis" OR "Marijuana Treatment" OR "Medical Cannabis" OR Cannabinol):ti,ab,kw | 4154 |
| 5 | #3 AND #4 | 7 |
| 6 | #2 OR #5 | 4154 |
| 7 | #1 AND #6 | 18 |
| 8 | Filters: Published between May 2016-September 2019 | 3 |

HIV/AIDS

| Search Number | Search Query | Results |
| --- | --- | --- |
| 1 | (HIV OR "Human Immunodeficiency Virus" OR "Human Immunodeficiency Viruses" OR "Human T Cell Lymphotropic Virus Type III" OR "Human T Cell Leukemia Virus Type III" OR LAV-HTLV-III OR "Lymphadenopathy Associated Virus" OR "Human T Lymphotropic Virus Type III" OR "AIDS Virus" OR AIDS OR "AIDS Viruses" OR "Acquired Immune Deficiency Syndrome Virus" OR "Acquired Immunodeficiency Syndrome Virus" OR HTLV-III OR “Acquired Immune Deficiency Syndrome” OR “Acquired Immune Deficiency Syndromes” OR “Acquired Immunodeficiency Syndromes”): ti,ab,kw | 29398 |
| 2 | (Cannabinoids OR Cannabinoid OR Cannabis OR Marijuana OR Marihuana OR Dronabinol OR Tetrahydrocannabinol OR THC OR Cannabidiol OR Marinol OR "synthetic cannabinoids" OR "synthetic cannabinoid" OR SCB OR "Medical Marijuana" OR "Medicinal Cannabis" OR "Marijuana Treatment" OR "Medical Cannabis" OR Cannabinol):ti,ab,kw | 4154 |
| 3 | (spice OR spices OR k2):ti,ab,kw | 632 |
| 4 | (Cannabinoids OR Cannabinoid OR Cannabis OR Marijuana OR Marihuana OR Dronabinol OR Tetrahydrocannabinol OR THC OR Cannabidiol OR Marinol OR "synthetic cannabinoids" OR "synthetic cannabinoid" OR SCB OR "Medical Marijuana" OR "Medicinal Cannabis" OR "Marijuana Treatment" OR "Medical Cannabis" OR Cannabinol):ti,ab,kw | 4154 |
| 5 | #3 AND #4 | 7 |
| 6 | #2 OR #5 | 4154 |
| 7 | #1 AND #6 |  |
| 8 | Filters: Published between May 2016-September 2019 | 60 |

MS

| Search Number | Search Query | Results |
| --- | --- | --- |
| 1 | ("Multiple Sclerosis" OR "Disseminated Sclerosis"): ti,ab,kw | 9279 |
| 2 | (Cannabinoids OR Cannabinoid OR Cannabis OR Marijuana OR Marihuana OR Dronabinol OR Tetrahydrocannabinol OR THC OR Cannabidiol OR Marinol OR "synthetic cannabinoids" OR "synthetic cannabinoid" OR SCB OR "Medical Marijuana" OR "Medicinal Cannabis" OR "Marijuana Treatment" OR "Medical Cannabis" OR Cannabinol):ti,ab,kw | 4154 |
| 3 | (spice OR spices OR k2):ti,ab,kw | 632 |
| 4 | (Cannabinoids OR Cannabinoid OR Cannabis OR Marijuana OR Marihuana OR Dronabinol OR Tetrahydrocannabinol OR THC OR Cannabidiol OR Marinol OR "synthetic cannabinoids" OR "synthetic cannabinoid" OR SCB OR "Medical Marijuana" OR "Medicinal Cannabis" OR "Marijuana Treatment" OR "Medical Cannabis" OR Cannabinol):ti,ab,kw | 4154 |
| 5 | #3 AND #4 | 7 |
| 6 | #2 OR #5 | 4154 |
| 7 | #1 AND #6 |  |
| 8 | Filters: Published between May 2016-September 2019 | 35 |

Parkinson’s Disease

| Search Number | Search Query | Results |
| --- | --- | --- |
| 1 | ("Parkinson Disease" OR "Lewy Body Parkinson Disease" OR "Primary Parkinsonism" OR "Idiopathic Parkinson Disease"): ti,ab,kw | 8703 |
| 2 | (Cannabinoids OR Cannabinoid OR Cannabis OR Marijuana OR Marihuana OR Dronabinol OR Tetrahydrocannabinol OR THC OR Cannabidiol OR Marinol OR "synthetic cannabinoids" OR "synthetic cannabinoid" OR SCB OR "Medical Marijuana" OR "Medicinal Cannabis" OR "Marijuana Treatment" OR "Medical Cannabis" OR Cannabinol):ti,ab,kw | 4154 |
| 3 | (spice OR spices OR k2):ti,ab,kw | 632 |
| 4 | (Cannabinoids OR Cannabinoid OR Cannabis OR Marijuana OR Marihuana OR Dronabinol OR Tetrahydrocannabinol OR THC OR Cannabidiol OR Marinol OR "synthetic cannabinoids" OR "synthetic cannabinoid" OR SCB OR "Medical Marijuana" OR "Medicinal Cannabis" OR "Marijuana Treatment" OR "Medical Cannabis" OR Cannabinol):ti,ab,kw | 4154 |
| 5 | #3 AND #4 | 7 |
| 6 | #2 OR #5 | 4154 |
| 7 | #1 AND #6 |  |
| 8 | Filters: Published between May 2016-September 2019 | 11 |

PTSD

| Search Number | Search Query | Results |
| --- | --- | --- |
| 1 | ("Parkinson Disease" OR "Lewy Body Parkinson Disease" OR "Primary Parkinsonism" OR "Idiopathic Parkinson Disease"): ti,ab,kw | 4953 |
| 2 | (Cannabinoids OR Cannabinoid OR Cannabis OR Marijuana OR Marihuana OR Dronabinol OR Tetrahydrocannabinol OR THC OR Cannabidiol OR Marinol OR "synthetic cannabinoids" OR "synthetic cannabinoid" OR SCB OR "Medical Marijuana" OR "Medicinal Cannabis" OR "Marijuana Treatment" OR "Medical Cannabis" OR Cannabinol):ti,ab,kw | 4154 |
| 3 | (spice OR spices OR k2):ti,ab,kw | 632 |
| 4 | (Cannabinoids OR Cannabinoid OR Cannabis OR Marijuana OR Marihuana OR Dronabinol OR Tetrahydrocannabinol OR THC OR Cannabidiol OR Marinol OR "synthetic cannabinoids" OR "synthetic cannabinoid" OR SCB OR "Medical Marijuana" OR "Medicinal Cannabis" OR "Marijuana Treatment" OR "Medical Cannabis" OR Cannabinol):ti,ab,kw | 4154 |
| 5 | #3 AND #4 | 7 |
| 6 | #2 OR #5 | 4154 |
| 7 | #1 AND #6 |  |
| 8 | Filters: Published between May 2016-September 2019 | 34 |
